# Supplementary material for: Tramtrack Is Genetically Upstream of Genes Controlling Tracheal Tube Size in Drosophila
Source: PLOS journal article supplement (doi:10.1371/journal.pone.0028985), 2011-12-22

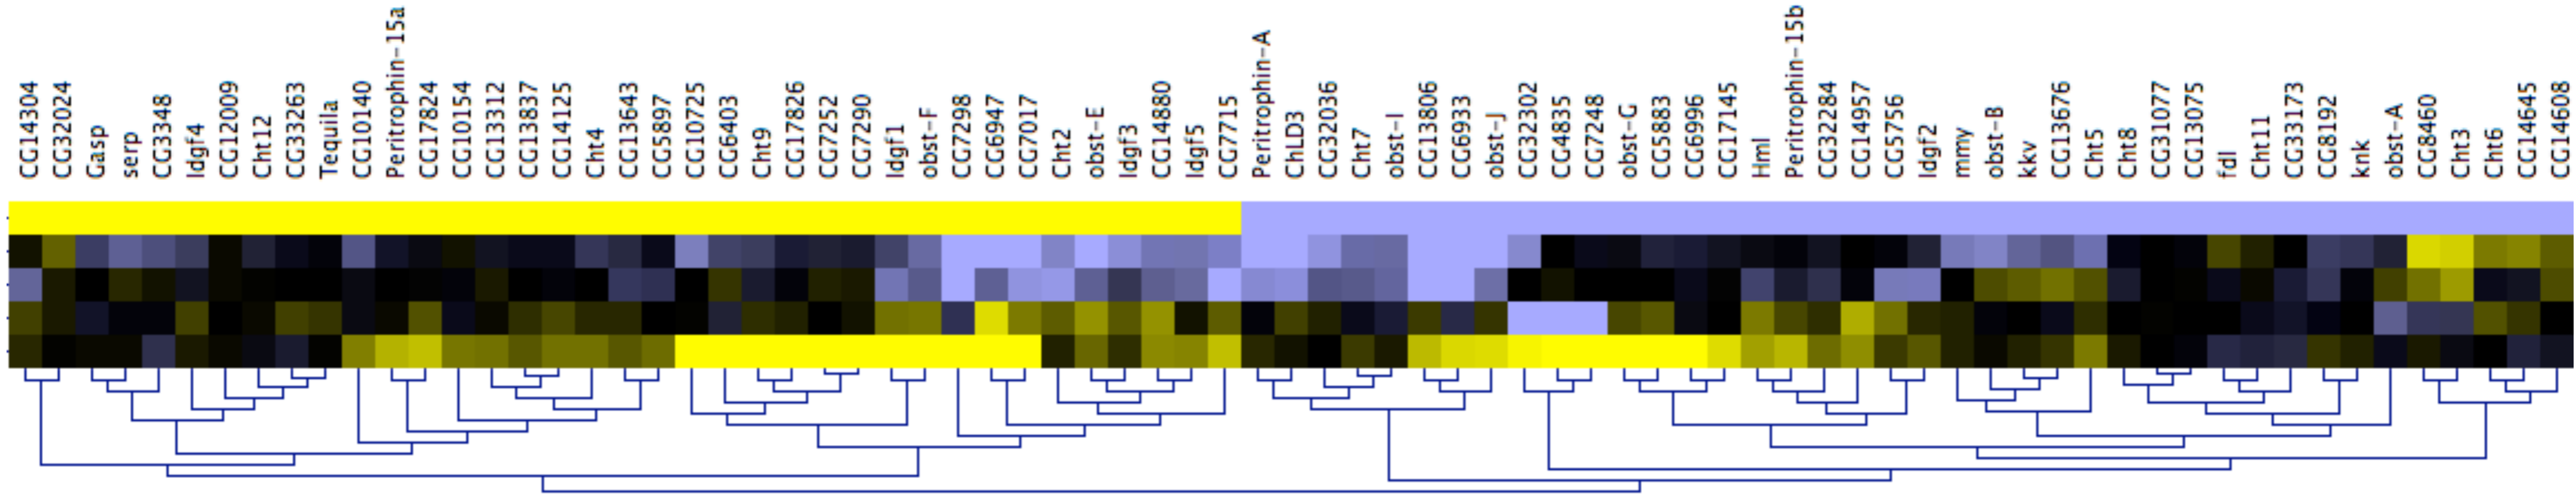

Supplement: S4 (10.1371/journal.pone.0028985.s004) [file journal.pone.0028985.s004]
