# Supplementary material for: Tramtrack Is Genetically Upstream of Genes Controlling Tracheal Tube Size in Drosophila
Source: PLoS One. 2011 Dec 22;6(12):e28985. doi: 10.1371/journal.pone.0028985 (PMC3245245; doi:10.1371/journal.pone.0028985)
Supplement: Table S1 — Number of putative candidate genes after ttk mis-expression. (XLS) [file pone.0028985.s005.xls]

## Sheet: Sheet1
Supplementary Table 1: Number of putative candidate genes after ttk mis-expression
Each panel shows in a specific genetic background (left: mutant; right: over-expression) the number of candidate genes present in the dataset at a defined parameter combination. Assessed were p-values (0.001, 0.005, 0.01, 0.05) and apparent transcriptional changes (logFC = lg2 fold change). Given is the number of candidates (at that parameter set) in enriched cell populations (cells) and whole em…
in the ttkD2-50 mutant						after ttk over-expression under btl-GAL4 control
at p-value <= 0.001
logFC	common	cells	embryos	fraction		logFC	common	cells	embryos	fraction
0.7	3	162	9	0.02		0.7	13	52	98	0.25
0.8	3	162	9	0.02		0.8	13	52	89	0.25
0.9	3	162	9	0.02		0.9	12	52	83	0.23
1	3	160	9	0.02		1	12	52	76	0.23
1.1	3	158	9	0.02		1.1	12	52	65	0.23
1.2	2	154	9	0.01		1.2	12	52	61	0.23
1.3	2	150	9	0.01		1.3	12	50	58	0.24
1.4	2	146	9	0.01		1.4	11	47	56	0.23
1.5	2	142	9	0.01		1.5	11	44	49	0.25
2	2	113	9	0.02		2	8	21	35	0.38
3	2	58	5	0.03		3	4	8	10	0.5
4	1	17	1	0.06		4	0		5
at p-value <= 0.005
0.7	28	393	81	0.07		0.7	37	228	213	0.16
0.8	27	382	81	0.07		0.8	33	208	182	0.16
0.9	27	365	81	0.07		0.9	29	181	161	0.16
1	27	349	81	0.08		1	26	143	145	0.18
1.1	27	333	81	0.08		1.1	26	129	124	0.2
1.2	25	312	81	0.08		1.2	25	119	116	0.21
1.3	24	296	81	0.08		1.3	23	104	107	0.22
1.4	24	278	81	0.09		1.4	21	94	101	0.22
1.5	24	266	75	0.09		1.5	17	81	89	0.21
2	18	188	43	0.1		2	9	37	61	0.24
3	3	76	11	0.04		3	4	9	12	0.44
4	1	21	3	0.05		4	0		5
at p-value <= 0.01
0.7	51	534	155	0.1		0.7	49	373	314	0.13
0.8	49	509	155	0.1		0.8	44	306	256	0.14
0.9	49	479	155	0.1		0.9	37	251	222	0.15
1	48	455	155	0.11		1	31	198	198	0.16
1.1	48	426	153	0.11		1.1	30	170	173	0.18
1.2	45	398	147	0.11		1.2	28	149	162	0.19
1.3	41	371	141	0.11		1.3	25	128	149	0.2
1.4	40	347	134	0.12		1.4	23	116	140	0.2
1.5	37	330	117	0.11		1.5	19	98	125	0.19
2	26	218	58	0.12		2	10	41	86	0.24
3	3	82	12	0.04		3	4	10	12	0.4
4	1	21	3	0.05		4	0		5
at p-value <= 0.05
0.7	278	1050	969	0.26		0.7	151	691	699	0.22
0.8	243	929	889	0.26		0.8	116	552	558	0.21
0.9	210	844	777	0.25		0.9	96	422	468	0.23
1	182	761	676	0.24		1	72	322	397	0.22
1.1	165	680	586	0.24		1.1	60	270	340	0.22
1.2	149	615	512	0.24		1.2	56	230	309	0.24
1.3	125	548	439	0.23		1.3	42	183	274	0.23
1.4	115	500	378	0.23		1.4	37	158	251	0.23
1.5	101	460	326	0.22		1.5	32	135	227	0.24
2	52	273	161	0.19		2	13	51	124	0.25
3	8	87	35	0.09		3	4	10	12	0.4
4	1	21	6	0.05		4	0		5
