# Supplementary material for: Tramtrack Is Genetically Upstream of Genes Controlling Tracheal Tube Size in Drosophila
Source: PLoS One. 2011 Dec 22;6(12):e28985. doi: 10.1371/journal.pone.0028985 (PMC3245245; doi:10.1371/journal.pone.0028985)
Supplement: Table S3 — Expression enrichment in FACS-sorted cell populations. (XLS) [file pone.0028985.s007.xls]

## Sheet: list_w_gene_names.txt
Supplementary Table 3: Expression enrichment in FACS-sorted cell populations
Signal intensities in whole embryos or sorted cell populations. All control embryo and control cell microarrays normalised with each other. Enrichment ratio and p-value for enrichment calculated with Cybert-T.
		Signal in		Enrichment
Probeset	Symbol	embryos	cells	ratio	p-value
1623697_s_at	CG33465	4.29935	8.87493	2.06425	8.41e-09
1640654_at	He	5.18933	10.6738	2.05687	7.16e-06
1636689_at	CG4259	5.59145	11.4588	2.04935	2.7e-05
1626882_at	lush	4.48403	8.89896	1.98459	1.64e-06
1631436_at	Mst98Cb	3.40602	6.65857	1.95494	0.00022465
1628018_at	Hml	4.90946	9.51935	1.93898	0.00950351
1640207_at	CG3635	5.1357	9.92545	1.93264	1.02e-06
1640956_at	CG4725	4.11376	7.83932	1.90564	0.0074864
1627746_at	eater	4.15741	7.82213	1.88149	0.00593487
1628226_at	CG8539	3.71681	6.95044	1.87	8.04e-06
1629847_at	Pxn	3.66202	6.73276	1.83854	0.000251836
1624467_a_at	CG8046	5.32916	9.76711	1.83277	5.25e-08
1630256_at	lectin-24Db	4.87441	8.91159	1.82824	3.54e-06
1631797_at	Or1a	5.37145	9.78711	1.82206	4.23e-06
1636670_at		4.18248	7.61682	1.82113	0.00165393
1640681_at	CG4950	3.84975	6.9326	1.80079	0.0014453
1631505_at	Sr-CIII	4.38244	7.89128	1.80066	0.0016902
1638859_at	CG14741	3.9381	6.83984	1.73684	0.00026388
1634786_at	lectin-28C	6.9619	12.0006	1.72375	1.69e-05
1628232_at	CG30046	5.59209	9.6211	1.72048	1.96e-07
1626198_at	Cyp4d8	4.70199	8.04733	1.71147	1.29e-05
1641071_at	CG8343	3.80429	6.50575	1.71011	7.98e-05
1637794_at	CG4927	4.68094	7.92871	1.69383	0.0001
1638969_at	CG6279	6.17611	10.4493	1.69189	1.06e-06
1636682_at	CG31778	6.50468	10.9983	1.69082	1.2e-08
1636623_at	Ance-5	7.36771	12.4386	1.68825	3.51e-05
1639502_at	nimC1	7.84035	13.148	1.67697	5.2e-06
1633991_at	CG31445	5.70881	9.51553	1.66682	0.000150641
1639990_at	CG17855	5.25759	8.76212	1.66656	1.17e-05
1624599_at	CG34331	6.79523	11.2044	1.64886	2.09e-06
1627679_at	CG12470	5.08118	8.36054	1.64539	3.23e-06
1631666_s_at	CG9766	4.61082	7.54183	1.63568	2.57e-06
1633994_at	CG34402	4.55368	7.43859	1.63354	0.00291626
1624413_at	CG14527	7.00322	11.39	1.6264	1.08e-07
1630137_at	CG15696	5.51813	8.92597	1.61757	0.000249297
1638892_at	CG5397	7.61314	12.2328	1.6068	2.35e-05
1633237_at	Idgf1	7.06763	11.3491	1.60579	0.000415969
1634295_at	hoe2	5.75515	9.23896	1.60534	0.000166405
1632975_at	CG4398	7.49768	12.0282	1.60425	8.21e-06
1636145_at	Spn28D	5.62255	9.0113	1.60271	0.00203024
1636415_at	et	6.23436	9.98534	1.60166	3.39e-06
1628032_a_at	LpR2	6.69436	10.6804	1.59544	2.24e-06
1633815_at	CG31191	4.41868	7.01822	1.58831	0.00759504
1628174_at	nimB1	7.58018	12.0217	1.58594	0.000114886
1630072_a_at	CG10097	4.8139	7.57827	1.57425	0.000757068
1629827_s_at	Hsp70Bbb	4.74194	7.42315	1.56543	0.0144631
1637062_at	CG18745	4.89487	7.62912	1.55859	0.0412025
1637857_at	lectin-24A	5.19947	8.08727	1.5554	0.00204137
1639730_at	CG34054	7.43543	11.5608	1.55483	0.000110005
1626956_s_at		5.84543	9.00368	1.54029	0.00361856
1635893_at	alpha-Est8	6.1387	9.45255	1.53983	9.89e-07
1632071_at	CG8870	5.14919	7.86822	1.52805	0.00853767
1641429_at	GstE2	8.43993	12.7436	1.50992	1.39e-06
1630412_at	nimB5	7.89198	11.906	1.50861	0.000162635
1633385_at	Karl	8.06704	12.1543	1.50666	5.08e-08
1631895_s_at		4.08961	6.15737	1.50561	0.0197296
1631604_at		7.57589	11.3566	1.49904	0.000250511
1631123_at	Corin	3.90788	5.82321	1.49012	7.29e-05
1632210_at	CG30091	5.10402	7.58386	1.48586	0.000423548
1632490_at	CG8008	6.67418	9.91512	1.48559	2.86e-06
1633645_at		7.62431	11.3074	1.48307	2.82e-06
1637643_at	FucTB	7.6301	11.3028	1.48134	2.57e-07
1637146_at		5.64953	8.36212	1.48015	0.0017039
1633914_at	Gal	7.90732	11.6949	1.479	5e-06
1628716_at	CG13283	2.96779	4.38509	1.47756	0.135325
1627671_s_at		4.70136	6.93855	1.47586	0.013805
1639516_at	CG30187	6.94639	10.2498	1.47555	4.07e-08
1628861_at	CG7120	7.69599	11.3396	1.47344	1.9e-06
1624256_at	CG16857	7.33252	10.8004	1.47294	0.000559417
1638015_at		5.1416	7.57231	1.47275	8.41e-06
1633496_at		5.60119	8.24716	1.47239	3.67e-05
1628709_at	CG34265	3.32734	4.89894	1.47233	0.00926351
1638299_at	CG42674	4.52204	6.6557	1.47183	0.0642755
1624031_at		2.61442	3.81715	1.46004	0.108571
1638567_at	CG1092	8.95941	13.0647	1.45821	6.73e-10
1640847_at	CG13791	4.64517	6.7694	1.4573	0.000110561
1625457_at	CG10031	5.9848	8.71576	1.45632	0.00444435
1630978_s_at		5.08704	7.34945	1.44474	0.00466076
1624452_a_at	ple	3.93061	5.67273	1.44322	0.0144043
1629322_at	Pde6	7.03824	10.1523	1.44244	7.1e-06
1624846_at	CG10764	5.14574	7.42128	1.44222	0.00120754
1630555_at	CG33346	3.0461	4.39164	1.44173	0.0625919
1625116_at	trol	8.00071	11.5135	1.43906	3.74e-05
1634503_at	CG15695	8.60532	12.3774	1.43834	2.6e-06
1630770_at		7.35448	10.5721	1.4375	2.42e-08
1623579_at	CG33773	2.73114	3.92497	1.43712	0.0457416
1632561_at	CG42345	4.98927	7.16979	1.43704	0.00163495
1634069_at	CG41520	6.39915	9.19296	1.43659	0.00362149
1639323_at	TotC	2.72324	3.90585	1.43426	0.1081
1630102_at	CG12617	5.04944	7.23945	1.43371	0.000101721
1624171_at	CG13488	5.58493	7.98533	1.4298	5.56e-05
1628715_a_at	Karl	8.95243	12.7938	1.42909	1.85e-08
1635180_at		4.89737	6.9808	1.42542	0.0176941
1641192_at	CG14523	8.38771	11.954	1.42518	5.03e-06
1637871_at	CG11423	3.75231	5.33083	1.42068	0.00140874
1631821_at	Sr-CI	9.08455	12.8956	1.41951	0.00303056
1640189_at	trol	6.18547	8.77215	1.41819	3.39e-05
1634726_s_at	CG31827	3.16115	4.48194	1.41782	0.0728668
1623555_at	CG10131	6.58383	9.33441	1.41778	0.00140783
1631274_at	CG18095	3.60084	5.10353	1.41731	0.00321312
1626466_at	Cyp6a15Psi	3.12978	4.43425	1.41679	0.059854
1624817_at	Sr-CIV	6.05261	8.57249	1.41633	1.24e-05
1629857_at	CG10359	6.87601	9.73848	1.4163	0.00378664
1624409_a_at	Npc2h	8.07598	11.4308	1.4154	0.00101707
1631533_at	Cyp6a22	6.39367	9.04772	1.41511	3.4e-05
1625611_at	nimB4	9.33114	13.1998	1.4146	0.000175921
1639897_at	CG3091	5.36655	7.56704	1.41004	0.003211
1640223_a_at	trol	7.98982	11.2656	1.41	1.74e-06
1625644_at	CG2641	7.91146	11.1538	1.40982	3.68e-07
1640301_a_at	Ndae1	7.05055	9.91107	1.40571	5.77e-05
1641534_at	CG11842	3.65026	5.12694	1.40454	0.0151958
1633696_at	TM4SF	7.93578	11.1417	1.40398	1.31e-06
1625227_at	CG30456	8.10297	11.3726	1.40351	7.13e-07
1627353_at	Gr59f	5.25781	7.37844	1.40333	0.000189843
1633607_at	CG2444	5.73367	8.03483	1.40134	0.0120789
1633214_at	CG4835	3.31075	4.63789	1.40086	0.158305
1629705_at	CG6084	7.85969	10.9934	1.39871	0.00106502
1638636_at	CG12512	6.33818	8.85697	1.3974	0.00700147
1623364_at	CG4250	9.36687	13.0822	1.39665	4.26e-05
1640410_at	CG33459	5.76491	8.05079	1.39652	0.00944667
1641442_a_at	trol	8.92935	12.4672	1.39621	1.61e-06
1628539_at	CG31174	6.17626	8.61722	1.39522	1.26e-05
1635835_at	CR30374	3.06772	4.27702	1.3942	8.12e-05
1635578_at	CG31975	5.7845	8.03719	1.38944	0.000371936
1627649_at	Neu3	9.09867	12.6395	1.38916	4.35e-09
1633218_a_at	UGP	7.2646	10.0899	1.38891	0.000275044
1627705_at		3.5244	4.89336	1.38842	0.000465758
1624752_at	Prestin	7.04441	9.77304	1.38735	1.03e-05
1629425_at	CG13157	6.27094	8.69507	1.38657	0.00295057
1623103_at	CG14946	9.3866	13.0104	1.38606	9e-07
1641068_a_at	spz	9.27351	12.8366	1.38422	5.77e-06
1634165_at	CG11378	8.32173	11.5168	1.38394	0.000598533
1626896_at	CG34437	7.34334	10.1614	1.38376	4.31e-06
1637211_at	CG13045	5.63253	7.79326	1.38362	0.107245
1629431_at	CG18747	6.31686	8.73949	1.38352	0.027705
1639611_at	Lpin	7.16434	9.91118	1.38341	8.49e-05
1630186_at	CG13743	3.56255	4.92497	1.38243	0.00862813
1634175_at	Mctp	4.02167	5.55144	1.38038	0.000216338
1640957_at	Hexo2	9.13266	12.6056	1.38028	1.84e-05
1628345_at	Cyp6a9	3.16445	4.36746	1.38016	0.148317
1625371_at	CG13048	7.40446	10.1988	1.37738	0.0237936
1631371_s_at	Pde8	5.84279	8.04512	1.37693	0.00349038
1623689_a_at	CG14642	8.12717	11.1842	1.37615	3.23e-05
1625140_at	NtR	9.28999	12.7828	1.37598	3.84e-09
1624468_a_at	CG10026	8.40416	11.5454	1.37377	2.67e-05
1632881_at		5.84569	8.03042	1.37373	0.00706035
1636946_at	Spn88Eb	4.80728	6.60076	1.37308	0.000200636
1627507_at	CG5704	7.56604	10.3849	1.37256	9.78e-07
1623885_at	alpha-Est1	7.9428	10.9007	1.3724	0.000220556
1634805_at	CG14642	7.52922	10.3266	1.37154	9.51e-05
1626955_at	CG12014	6.15189	8.43643	1.37136	0.00029388
1628052_at	Cyp6a17	5.95417	8.16316	1.371	0.0121475
1633354_at	Cyp6v1	6.13187	8.39738	1.36947	4.16e-05
1640050_at		6.28051	8.59615	1.3687	0.00332422
1634973_s_at	nuf	7.5533	10.3348	1.36825	1.82e-05
1633145_at	PGRP-LF	7.88794	10.7908	1.36801	2.21e-05
1624057_at	CG16713	7.77551	10.6366	1.36796	0.000635604
1638515_at	CG13155	3.80643	5.20271	1.36682	0.00110047
1625346_s_at		7.21658	9.84899	1.36477	0.00918175
1635110_at	Cyp6a13	8.27421	11.2913	1.36464	0.00482028
1632872_at	Acp24A4	3.03946	4.14285	1.36302	0.00258292
1633386_s_at	mthl8	5.01109	6.83004	1.36298	0.364882
1638487_at	CG13511	5.96414	8.11758	1.36106	0.000980664
1639456_at	CG31862	3.46731	4.71776	1.36064	0.208862
1626666_s_at	RhoGAP16F	8.73214	11.8671	1.35901	2.17e-07
1623340_at	CG15333	5.33855	7.25006	1.35806	0.0403692
1628254_at	CG42784	4.58722	6.2253	1.3571	0.0221097
1632587_s_at	CG9134	3.29298	4.46505	1.35593	0.0311248
1634688_at	RabX5	5.09455	6.89743	1.35388	0.00487309
1624441_at	Eip93F	4.73959	6.41603	1.35371	0.0129243
1624737_at		4.01358	5.43158	1.3533	0.00146687
1640540_at	CG30273	8.17327	11.0593	1.35311	4.82e-05
1627670_at	CG18788	4.30926	5.82421	1.35156	0.00125589
1630088_at	CG16743	6.26363	8.46095	1.35081	0.00263314
1632833_at	CG7431	3.45652	4.66792	1.35047	0.0909428
1640584_at	Cyp9f3Psi	7.71358	10.4122	1.34986	7.47e-05
1634148_at	CG4842	5.28499	7.12714	1.34856	0.00316309
1637388_at	CG13511	5.8743	7.91598	1.34756	9.2e-05
1632131_at	5-HT7	4.71993	6.35223	1.34583	0.0084929
1637358_at	CG10232	6.04839	8.13268	1.3446	0.00951462
1625023_a_at	nAcRbeta-21C	9.41994	12.6599	1.34395	2.24e-07
1626704_at	CG7248	3.26999	4.39417	1.34379	0.278362
1634143_at	Cyp6w1	4.53644	6.08427	1.3412	0.0550874
1632841_x_at	Hsp70Bbb	9.25659	12.413	1.34099	0.0721958
1637192_at	CG16732	3.45261	4.62844	1.34056	0.0577801
1629181_at	CG33494	9.4484	12.6635	1.34028	2.89e-08
1635486_at	CG33468	6.34085	8.49254	1.33934	0.00191003
1626401_at	Cyp6a2	4.66752	6.24409	1.33777	0.00424375
1632675_s_at	CG5455	8.20091	10.9685	1.33748	1.51e-06
1626999_at		6.02074	8.03676	1.33485	0.00486038
1640494_at	CG13272	7.66998	10.2364	1.3346	0.00139837
1623299_at	Mmp2	7.52086	10.0322	1.33391	2.4e-06
1630119_s_at		7.42118	9.89876	1.33385	0.0162397
1634939_at	CG13077	6.54046	8.71193	1.33201	5.59e-05
1633187_at	CG6619	5.94798	7.90704	1.32937	0.00026599
1632522_at		5.08796	6.75826	1.32829	0.0024327
1629990_at	CG14040	8.86711	11.777	1.32817	1.04e-08
1637514_at	CG14142	3.76259	4.9948	1.32749	0.00250037
1639426_at	CG9593	5.94374	7.88794	1.3271	0.000107798
1630802_at	Cyp6d4	6.55518	8.68483	1.32488	0.000180299
1636976_at	CG5322	7.5125	9.95064	1.32455	0.026215
1641102_at	CG14141	5.37049	7.11239	1.32435	0.000672518
1630590_at	CG18417	6.10103	8.07491	1.32353	0.0150221
1628079_at	CG5458	5.32246	7.04345	1.32334	0.0114066
1631571_a_at	spir	6.4617	8.549	1.32303	0.000546639
1628567_at	CG13565	7.98326	10.5502	1.32154	7.64e-07
1626759_at	CG34136	7.77838	10.279	1.32149	6.21e-07
1626171_at		7.74696	10.2351	1.32118	0.0025825
1632424_at	CG13995	5.24479	6.92849	1.32102	0.00293155
1633790_at	CG30043	7.05294	9.30982	1.31999	0.00195387
1637488_at	Cad88C	6.50053	8.57977	1.31986	0.0138884
1635770_at	CG31097	4.07977	5.38463	1.31983	0.240645
1628898_at		3.65944	4.82764	1.31923	0.00678746
1637659_a_at	nimC2	3.74245	4.93405	1.3184	0.00088013
1630553_at	alphaPS5	4.48784	5.9132	1.3176	0.0158158
1624874_at	CG32271	3.95159	5.20599	1.31744	0.011554
1629054_at		4.98003	6.55675	1.31661	3.21e-06
1623777_s_at	CG1358	6.80393	8.95655	1.31638	0.000442272
1630883_at	CG33978	5.67705	7.47305	1.31636	0.0348238
1639105_at	ppk10	4.26238	5.60832	1.31577	0.0369068
1625354_at	alpha-Est3	7.84181	10.3153	1.31542	0.00108255
1639643_at	CG18557	5.1559	6.7801	1.31502	0.00223742
1626917_at	CG31337	10.2414	13.46	1.31427	2.57e-05
1641108_at	CG17928	6.63547	8.7196	1.31409	4.85e-06
1623963_at	CG32115	5.78046	7.59475	1.31386	0.00152128
1628075_at	olf186-M	8.07074	10.599	1.31327	0.00893484
1631773_at	Cpr30B	5.08658	6.674	1.31208	0.00540422
1632509_at	CG4434	4.33501	5.68509	1.31144	0.00211911
1639956_at	CG17760	6.22776	8.16716	1.31141	0.000462636
1636333_a_at	mthl2	4.76728	6.25176	1.31139	0.0653303
1636857_at	CG15879	5.99434	7.85419	1.31027	0.000214099
1629906_s_at	Kaz1-ORFA	7.52953	9.8634	1.30996	1.05e-06
1624147_at		3.24254	4.24742	1.3099	0.000438273
1637604_at	CG42663	6.22488	8.14647	1.30869	2.13e-06
1624377_s_at		7.50541	9.81162	1.30727	0.00748563
1635573_at	CG42663	7.63163	9.97585	1.30717	2.73e-06
1641504_s_at	wdp	9.32518	12.1695	1.30501	6.16e-05
1623049_at	pyd	6.09422	7.94782	1.30416	0.0237883
1633447_at	Mctp	7.5423	9.83249	1.30365	6.61e-05
1625718_at		4.21508	5.49341	1.30328	3.22e-05
1635987_at	CG12116	5.58925	7.28154	1.30278	0.032665
1634885_at	Or67b	2.99427	3.90056	1.30268	0.000330775
1624164_s_at	GlcAT-P	9.28459	12.0848	1.3016	2.34e-08
1634816_at	CG8401	5.29378	6.89038	1.3016	0.00680051
1631172_at	CG7848	2.98265	3.88127	1.30128	0.00445206
1627509_s_at	hoe1	9.72704	12.6547	1.30098	1.6e-06
1640790_at	CG11293	6.34206	8.23329	1.2982	0.00217912
1633450_at	CG16781	3.43987	4.46553	1.29817	0.000196838
1634978_at	CG13117	6.19574	8.04137	1.29789	0.000329158
1633140_at		6.48985	8.42171	1.29767	0.00231886
1634537_at	CG12502	3.62224	4.7004	1.29765	0.0356856
1636292_at	Cyp313a4	3.89992	5.05963	1.29737	0.00709003
1630547_at	CG4723	7.62719	9.894	1.2972	1.76e-05
1629669_x_at		5.78747	7.5033	1.29647	0.0018178
1637962_at	spir	7.93742	10.2894	1.29632	0.000211583
1623895_at		4.33652	5.61445	1.29469	0.000500417
1625274_at		5.79138	7.49379	1.29396	0.00606943
1640991_at	CG32091	9.24666	11.9411	1.2914	5.25e-06
1623831_x_at		6.07033	7.83535	1.29076	0.0626052
1623394_at	CG42260	6.58683	8.49357	1.28948	6.91e-06
1628107_at	CG3513	5.36976	6.92296	1.28925	0.000920396
1631370_at	CG30026	6.81878	8.78933	1.28899	0.000790141
1626022_at	Cyp12e1	3.82755	4.93284	1.28877	0.00278268
1637367_at	CG10799	6.63066	8.54468	1.28866	0.00584999
1637310_at		6.15167	7.92703	1.2886	0.00424388
1624146_at	CG5174	5.36186	6.90687	1.28815	0.000926683
1635362_at	CG13654	5.9135	7.60607	1.28622	0.00362431
1637408_at	CG34234	6.61198	8.50386	1.28613	0.000307658
1626418_a_at	CG14691	3.9548	5.08578	1.28598	0.0230379
1636022_at		4.14449	5.32899	1.2858	4.2e-05
1634633_s_at		8.1239	10.4357	1.28457	0.0526279
1638139_at	CG31664	5.21006	6.69045	1.28414	0.0224172
1627281_at	CG3117	3.77721	4.84855	1.28363	0.0094803
1633811_at	CG13962	5.44558	6.98943	1.2835	0.0154029
1632910_at	CG7512	7.35999	9.4431	1.28303	0.00704421
1624101_at	Cyp6a23	9.1827	11.7716	1.28194	0.000324852
1640405_at	l(2)01810	8.56573	10.9782	1.28164	6.09e-05
1626688_at	CG13004	8.26089	10.5861	1.28147	5.14e-05
1624123_at	CG13196	7.76148	9.94545	1.28139	0.0272308
1624628_at	CG10396	6.88375	8.82032	1.28132	3.76e-05
1628992_at	CG34253	9.6244	12.3308	1.2812	2.71e-07
1626273_at	CG6232	9.34188	11.9561	1.27984	0.000203628
1625609_at	CG32450	5.40249	6.91428	1.27983	0.00737052
1635644_at	CG33203	6.10794	7.80049	1.27711	0.000272506
1634547_at	CG32506	5.81355	7.42284	1.27682	0.010531
1637435_at	kek4	3.19353	4.07527	1.2761	0.0377664
1636882_s_at		5.05685	6.45277	1.27605	0.0423041
1627880_at	CG30334	4.3299	5.52483	1.27597	0.00175907
1629061_s_at	Hsp67Bb	9.74212	12.4265	1.27554	0.111806
1624540_at	CG14642	7.80829	9.9549	1.27491	0.00106462
1624577_at	Ace	6.60745	8.42089	1.27445	0.00898837
1639775_at	CG5388	4.66706	5.9464	1.27412	0.186166
1625385_at	ct	8.31279	10.5897	1.2739	0.0568588
1632701_at	Pal2	8.50317	10.8292	1.27355	0.113957
1637858_at	Cyp313b1	6.89495	8.78063	1.27349	0.00551993
1633801_s_at	CG9171	8.38355	10.6745	1.27326	2.55e-05
1637869_at	rdo	8.9598	11.4072	1.27316	0.00220359
1635283_at	nimB2	9.0687	11.5452	1.27308	0.0014672
1635449_s_at	Dip-B	9.24822	11.7737	1.27307	0.000440587
1624438_at	CG5017	4.72225	6.0104	1.27278	0.124466
1641232_s_at	CG32706	8.1228	10.3336	1.27217	0.000393848
1625761_a_at	Mmp1	6.87665	8.74494	1.27169	0.00245356
1623438_at	CG9505	5.0041	6.36299	1.27156	0.0534344
1636410_at	CG3505	10.1381	12.8836	1.27081	0.000115971
1628398_at	CG5853	10.2544	13.0211	1.26981	4.22e-08
1626080_at		7.30278	9.27304	1.2698	0.00383069
1630515_s_at	Glt	10.978	13.9252	1.26847	1.69e-07
1640162_at	CG34318	5.44244	6.90302	1.26837	0.0857119
1639149_at	CG15313	6.48371	8.22199	1.2681	0.0116449
1626038_at	frc	9.17955	11.6401	1.26805	5.82e-05
1636187_at	CG33798	2.94615	3.73408	1.26744	0.0033968
1629278_at		5.05622	6.4051	1.26678	0.0360485
1626074_at		6.81798	8.62776	1.26544	0.0514873
1632543_at	CG9003	7.03409	8.90093	1.2654	0.000711336
1629428_at	CG7342	3.63022	4.59052	1.26453	0.0839154
1626552_at	CG3568	8.51544	10.7636	1.26401	2.37e-05
1640097_at	Pxn	10.9261	13.8105	1.26399	2.14e-06
1633900_at	CG14044	4.84539	6.12313	1.2637	0.0504742
1625489_at	brp	5.57331	7.04211	1.26354	0.0345631
1633185_at	dpr14	6.46449	8.1671	1.26338	8.08e-05
1634750_at	CG34033	3.8587	4.87443	1.26323	0.104227
1628144_at	CG14273	7.19353	9.08653	1.26315	0.166091
1633674_at	CG31150	9.2469	11.6779	1.2629	9.52e-07
1638872_at	Hsp68	9.6145	12.1411	1.26279	0.110842
1637955_a_at	CG1827	7.30152	9.21601	1.2622	0.000286399
1632705_at	ninaD	8.38026	10.5752	1.26191	6.52e-06
1635554_at		4.71296	5.94689	1.26182	0.00346178
1636242_at	Ilp6	9.94676	12.5499	1.26171	7.36e-06
1631867_at	Idgf5	6.73075	8.4894	1.26129	0.0135964
1636194_s_at		4.70633	5.92691	1.25935	0.0143068
1626526_at	TotF	5.75821	7.25095	1.25924	0.00422015
1625825_at	BM-40-SPARC	11.0355	13.8835	1.25807	0.000127948
1636576_s_at	norpA	8.12003	10.2154	1.25805	0.00547146
1624655_at	CG6472	4.07039	5.11951	1.25774	0.16837
1628358_at	Tob	7.66556	9.64118	1.25773	0.0120106
1627317_a_at	Tbh	5.29185	6.65373	1.25736	0.011413
1623170_at		4.89254	6.1483	1.25667	0.00170562
1624756_at	CG5009	9.06702	11.3937	1.25661	5.54e-05
1638301_at	CG8157	9.7578	12.2607	1.2565	0.00197473
1632697_at		4.19528	5.27041	1.25627	0.000758994
1625683_at	CG5112	8.92085	11.2053	1.25608	0.000128622
1638260_s_at	CG2269	6.92988	8.70299	1.25586	0.0235854
1627744_at	CG15209	8.97884	11.2736	1.25557	4.74e-05
1636095_at	CG4619	10.4014	13.0591	1.25552	1.38e-07
1626908_at	CG8066	8.14845	10.2213	1.25439	0.000858195
1626050_at	oa2	5.10866	6.40704	1.25415	0.00347587
1637835_at	CG12177	8.72093	10.9357	1.25396	0.00323892
1630664_at		4.86468	6.09712	1.25334	0.000798646
1629849_at	Cyp6t2Psi	3.55157	4.4504	1.25308	0.00209446
1624241_at	NaCP60E	7.50846	9.40286	1.2523	0.0799224
1630108_a_at	r-cup	5.27303	6.60291	1.2522	0.00272693
1637142_at	CG9547	8.516	10.6564	1.25134	0.00188854
1641104_s_at	Eaat1	6.01888	7.5313	1.25128	0.137271
1624155_at		4.85496	6.07333	1.25095	6.21e-05
1630291_at	MtnB	5.60941	7.01327	1.25027	0.026613
1634693_at	CG5122	3.0904	3.86248	1.24983	0.00244925
1629172_s_at	rk	5.49301	6.86166	1.24916	0.0111317
1623272_at	Acp53C14b	3.39976	4.24645	1.24905	0.00165539
1623570_at	CG7924	6.71483	8.3848	1.2487	0.0139851
1639390_at	CG11637	5.137	6.41142	1.24809	0.0610179
1635366_at	CG5614	3.35141	4.18176	1.24776	0.000313283
1639396_s_at	CDase	8.96337	11.1834	1.24768	5.7e-05
1630353_at	CG31178	4.32086	5.39062	1.24758	0.00312796
1626303_s_at	CG34253	10.1147	12.6158	1.24727	3.99e-06
1635677_a_at	sty	9.61034	11.9805	1.24663	3.95e-05
1637203_at	rev7	5.24931	6.54267	1.24639	0.00138671
1636394_a_at	CG41520	5.33364	6.64614	1.24608	3.96e-05
1632341_at	CG13559	7.64157	9.52074	1.24591	0.00129828
1623747_at	CG5895	4.34676	5.41436	1.24561	0.0747713
1626821_s_at	Hsp70Bbb	10.8752	13.5366	1.24471	0.0740561
1623942_at	CG6974	3.54178	4.40686	1.24425	0.150105
1632391_at	CG14234	5.4866	6.82599	1.24412	0.00785674
1633172_at		4.64352	5.77564	1.24381	0.00175416
1623289_at	Obp83ef	7.59716	9.44621	1.24339	0.018961
1632265_at		3.47638	4.32107	1.24298	0.00634686
1629572_a_at	fat-spondin	10.6304	13.2054	1.24223	3.42e-05
1638959_at	CG8501	10.8223	13.4374	1.24164	1.3e-06
1641007_s_at		3.06638	3.80566	1.24109	0.000496162
1626047_at	Ssl2	5.59799	6.94626	1.24085	0.469474
1628666_at	CG3328	8.59116	10.6535	1.24006	0.0068464
1633442_at	PebII	2.49244	3.08893	1.23932	0.042671
1630375_at	Mec2	7.65677	9.48434	1.23869	0.00146024
1635714_s_at	fdl	9.40407	11.6443	1.23821	2.98e-05
1624819_s_at		9.84646	12.1907	1.23808	0.000234117
1623201_at	CG5783	8.83095	10.9329	1.23802	7.97e-05
1623968_at	CG10631	6.57735	8.14169	1.23784	0.000816615
1632600_at	CG34232	9.76756	12.0831	1.23706	2.91e-06
1631414_at	CG11313	5.93332	7.33784	1.23672	0.0155374
1623776_s_at	dsx	4.06237	5.0195	1.23561	0.0104579
1640478_at	CG31777	10.9017	13.4681	1.23541	2.84e-05
1639571_s_at	Hsp70Ab	10.5369	13.0133	1.23502	0.0643968
1635044_at	Hsp26	9.99551	12.3398	1.23453	0.185031
1626472_at	CG30340	4.17736	5.15452	1.23392	0.000565511
1625102_at	CG14299	7.57267	9.33919	1.23328	0.0078323
1624308_at	Sgs3	4.28674	5.28101	1.23194	0.00747125
1631229_at		3.0622	3.77221	1.23186	0.00013862
1638964_at	CG7800	9.42877	11.6147	1.23184	0.00491636
1639262_at	CG11669	4.22217	5.19899	1.23136	0.0121063
1631986_at	CG16998	4.58425	5.64412	1.2312	0.0357514
1626031_at	CG12539	4.56353	5.61784	1.23103	0.00870327
1624232_at	CG13891	4.07236	5.01252	1.23086	0.0225343
1624957_a_at	Tequila	8.87909	10.9204	1.22991	5.64e-06
1628230_x_at		4.88729	6.0089	1.2295	0.0149864
1629229_a_at	srp	9.12493	11.2186	1.22945	0.000351222
1637765_at	CG14147	8.84068	10.8676	1.22927	0.0821794
1624785_at		5.16399	6.34251	1.22822	0.00602266
1624830_at	Act79B	6.93928	8.5174	1.22742	0.000383629
1630049_at	CG4461	4.16935	5.11715	1.22733	0.132881
1640399_at	CG3775	4.58544	5.62748	1.22725	0.0167848
1640390_at	CG3649	4.57726	5.61441	1.22659	0.00151039
1628778_at	itp	9.74947	11.9533	1.22604	0.000586274
1634792_s_at	CG17838	4.8739	5.97523	1.22597	0.0208426
1627763_at	CG31048	7.52391	9.22188	1.22568	0.00143186
1639694_s_at	CR10102	4.63269	5.67781	1.2256	0.0691809
1633123_at	CG7201	8.31531	10.188	1.22521	0.085758
1637331_at		4.51979	5.5376	1.22519	0.0190319
1637605_s_at	CG1146	8.15486	9.99008	1.22505	6.19e-05
1626684_at	CG7607	6.50717	7.9712	1.22499	0.00183667
1633770_at	CAHbeta	8.81521	10.792	1.22425	0.000433117
1635004_at	sdt	3.44712	4.21916	1.22396	0.0700309
1633963_a_at	nAcRalpha-30D	5.41404	6.62539	1.22374	0.0466128
1629362_at	mthl8	5.21065	6.37229	1.22294	0.584742
1627077_at	CG12917	3.56601	4.36096	1.22292	0.0651425
1637336_at	CG5377	7.08689	8.66556	1.22276	0.000121571
1630759_at		5.2881	6.46497	1.22255	0.0326215
1627669_at	CG1791	3.75462	4.59005	1.22251	0.0719256
1631625_at	CG15563	4.44507	5.43359	1.22238	0.0764475
1627837_at	CG5527	6.87041	8.39738	1.22225	0.029788
1628566_at		7.36803	9.0035	1.22197	0.00102636
1641627_at	CG9396	5.90959	7.21819	1.22144	0.0310492
1636119_at	CG1468	6.02371	7.35656	1.22127	0.00864684
1638968_at	CG18171	4.69235	5.73038	1.22122	7.83e-05
1637614_s_at	CR40068	5.03218	6.14492	1.22112	0.000234184
1639414_at	Snoo	6.85467	8.37034	1.22111	0.0104734
1632070_at	Ugt58Fa	10.8314	13.2263	1.2211	5.37e-06
1626434_s_at		6.05009	7.38646	1.22089	0.00308469
1623676_at	Doa	4.10009	5.00438	1.22056	0.000309214
1631415_at	CG30414	3.71791	4.53702	1.22031	0.0108126
1636686_at	garz	4.07415	4.97085	1.2201	0.00752211
1629484_s_at	chinmo	9.24293	11.2762	1.21998	0.0334163
1628089_at	ham	9.00372	10.9786	1.21934	1.66e-05
1628949_at		3.97917	4.85095	1.21909	0.00297802
1641249_at		4.5417	5.53644	1.21902	0.0096083
1627205_at		4.61201	5.62198	1.21899	0.0163715
1625313_at	CG12826	4.53243	5.52395	1.21876	0.0476722
1639637_a_at	CG3376	10.5544	12.8579	1.21825	5.38e-08
1637309_a_at	Cyp12e1	5.10699	6.22142	1.21822	0.00315362
1636589_s_at	CG31960	3.72325	4.53477	1.21796	0.0173318
1637576_s_at	CG8839	10.0425	12.2199	1.21682	1.58e-05
1638143_a_at	Pvr	10.4936	12.768	1.21674	5.48e-09
1631549_s_at	CG18278	8.03089	9.7651	1.21594	0.000850056
1625462_s_at	CG31221	5.10857	6.21079	1.21576	0.0588574
1640278_at	CG31933	2.80632	3.41046	1.21528	0.000826532
1639704_at	CG14695	5.2485	6.37639	1.2149	0.0369444
1631394_at	CG31324	8.51956	10.345	1.21427	0.000341249
1636605_at	CG2816	5.84239	7.09202	1.21389	0.0464116
1623710_at	zye	5.44667	6.61082	1.21374	0.17878
1632499_at	Mur2B	5.36315	6.5093	1.21371	7.81e-05
1635200_at	CG11261	6.52138	7.91234	1.21329	0.0962097
1632133_at		5.51206	6.68668	1.2131	0.00942702
1625686_s_at	su(r)	9.49271	11.513	1.21282	0.000269879
1626683_at	snz	6.11387	7.41483	1.21279	0.000454262
1627360_at	pyd	6.46209	7.83625	1.21265	0.00054412
1633033_s_at	CG1732	7.06323	8.56126	1.21209	0.00649248
1639874_at	Tim17a1	2.95528	3.58193	1.21204	0.0124146
1628955_at	Ance-3	3.41364	4.13617	1.21166	0.00363686
1623959_at	CG1532	9.86276	11.9468	1.21131	1.28e-05
1640593_at	CG14570	7.461	9.03707	1.21124	0.104878
1632342_a_at	CG33080	8.15337	9.87432	1.21107	0.00230246
1629043_at	Gr93d	3.42254	4.14341	1.21062	0.0691005
1631475_at	AttD	3.08472	3.73316	1.21021	0.00202901
1635800_at	CG5431	10.0329	12.139	1.20992	0.00116934
1637983_s_at	CG10365	8.49443	10.2761	1.20974	0.0113739
1630266_at	Ilp4	10.2966	12.4527	1.20941	1.41e-05
1629468_at	CG9372	10.0246	12.1198	1.209	5.58e-06
1638993_at		2.84399	3.43808	1.20889	0.0378197
1625334_at	Npc2a	10.9142	13.1929	1.20879	1.46e-05
1630010_a_at	pnt	9.88309	11.9465	1.20878	0.00280409
1634733_at	CG3831	9.87968	11.941	1.20864	3.78e-05
1626131_at	CG11362	3.81291	4.60566	1.20791	0.00323472
1637109_s_at	CG3961	10.01	12.0904	1.20783	3.82e-06
1635671_at	CG33290	4.47664	5.40609	1.20762	0.00401693
1628128_at	CG6333	3.93638	4.75341	1.20756	0.0192804
1633241_at	pnt	8.76978	10.5899	1.20754	0.119126
1638381_s_at	CG32506	5.15326	6.22268	1.20752	0.00196048
1623677_at		4.87905	5.89145	1.2075	0.00858228
1635921_at	CG3502	7.59493	9.16788	1.20711	0.0724671
1640955_s_at		6.25614	7.5502	1.20685	0.00232581
1635832_at	CG12413	8.435	10.1795	1.20682	0.000331129
1632690_a_at	CG13049	9.26094	11.1752	1.20671	0.06428
1626804_at	CG5379	5.0532	6.09738	1.20664	0.0292209
1625671_at	lectin-37Db	4.81799	5.81211	1.20634	0.043912
1636444_at	CG13871	2.96404	3.57527	1.20622	0.00631406
1623787_at	LKR	8.91113	10.7479	1.20612	0.000320726
1624272_at	CHKov1	9.19292	11.083	1.2056	0.0113115
1627965_s_at		6.22762	7.50597	1.20527	0.000153233
1631701_a_at	Cpr49Ac	7.89716	9.51818	1.20527	4.59e-05
1634315_a_at	CG32982	9.80862	11.8209	1.20515	1.72e-05
1633937_at		2.70303	3.25704	1.20496	0.00209629
1625940_s_at	sim	8.20622	9.88815	1.20496	0.00362373
1625636_s_at	pan	8.25932	9.95033	1.20474	0.139854
1629486_at	Ccp84Ag	5.34399	6.43808	1.20473	0.305201
1633612_at	ps	8.80852	10.6105	1.20458	0.0322968
1624237_at	CG15099	9.70354	11.6878	1.20449	0.000428056
1632034_at	CG11737	9.17968	11.0521	1.20398	1.43e-05
1636608_at	Dh31-R1	7.15716	8.61586	1.20381	0.0141463
1626391_at		3.38146	4.07036	1.20373	0.00551607
1641387_at	CG15650	7.54439	9.08054	1.20361	0.219715
1637439_at	CG14709	3.30811	3.98152	1.20356	0.00124401
1622935_at	CG12828	4.93554	5.94021	1.20356	0.0135759
1624542_at	Pde1c	5.32193	6.4048	1.20347	0.0153253
1631835_at	CG6300	6.06515	7.29908	1.20345	0.0671226
1624900_at	CG31051	9.91807	11.9334	1.2032	0.000389094
1625369_at	CG10877	8.09526	9.738	1.20293	0.00290042
1630848_at	obst-I	4.85458	5.83961	1.20291	0.23077
1626199_at	CG12104	10.355	12.4559	1.20289	1.71e-07
1634253_at	CG9917	9.22365	11.0895	1.20229	7.34e-06
1627958_at	CG30269	10.5103	12.6354	1.20219	0.000116603
1632622_at	gfA	4.47324	5.37686	1.20201	0.00344539
1633947_at	Cyp6a18	2.90174	3.48766	1.20192	0.369545
1634034_at	RhoGAP68F	9.72731	11.6861	1.20137	0.000355095
1641374_at		4.17682	5.0179	1.20137	0.000889754
1634630_at	CG5707	8.62823	10.3657	1.20137	0.00330624
1638854_s_at	CG42709	9.92753	11.9253	1.20124	3.2e-07
1631512_at	CG9377	3.4261	4.11494	1.20106	0.000896782
1637726_at		3.97236	4.77032	1.20088	0.0150569
1639381_at	Cyp6a19	3.77792	4.53682	1.20088	0.243057
1634153_at	CG14052	5.28699	6.34831	1.20074	9.42e-07
1641542_at	l(1)G0196	8.1009	9.72517	1.2005	0.0332186
1636631_at	CG1139	3.36067	4.03405	1.20037	0.157722
1637714_a_at	Ance-3	4.99548	5.99614	1.20031	0.00751448
1627508_at		6.8829	8.26023	1.20011	0.113464
1635074_s_at		6.46062	7.75259	1.19998	0.0153187
1634310_at	TpnC4	6.93212	8.31785	1.1999	0.0364495
1640982_at	CG41284	3.63436	4.36046	1.19979	0.000804598
1636698_at	nxf4	3.00928	3.60773	1.19887	0.00622116
1633206_at	CG9780	7.01695	8.40875	1.19835	0.0282004
1640590_at	CG32195	8.13954	9.75303	1.19823	3.92e-05
1639201_at	CG34169	3.24217	3.88453	1.19813	0.00307341
1627802_s_at	Sur-8	10.0314	12.0187	1.1981	0.000395155
1626740_at	Cpr72Ec	3.81045	4.56528	1.19809	0.00793006
1640030_at	CG4168	5.5871	6.69172	1.19771	0.0674609
1633393_at	CG6499	4.63493	5.55048	1.19753	0.0777509
1623752_at	CG31091	5.21813	6.24805	1.19737	0.157678
1641642_at	Spn77Bb	2.86603	3.43166	1.19736	0.0778359
1641112_at	CG31560	4.29432	5.1411	1.19718	0.00139447
1629103_at		3.10887	3.72131	1.197	0.0103185
1628189_at	Drep-2	7.2001	8.61753	1.19686	0.107945
1624651_at		4.38445	5.24733	1.19681	0.00082616
1634460_at		2.57673	3.08384	1.1968	0.101721
1639167_at	Ir54a	3.26698	3.90964	1.19671	0.056331
1625065_s_at	SK	8.26637	9.89106	1.19654	0.0586717
1627130_at	CG7568	3.70669	4.43471	1.19641	0.00240468
1632204_at	Mmp1	7.19114	8.60322	1.19636	0.0259757
1635772_at	CG9287	5.08281	6.08064	1.19632	0.0328119
1639143_at	CG32302	7.19571	8.60628	1.19603	0.199191
1631228_a_at	sPLA2	8.07699	9.66015	1.19601	0.0618462
1641230_at	Ast-CC	3.10765	3.71614	1.1958	0.0153595
1629394_at	Cpr64Ab	9.10509	10.8847	1.19545	0.141198
1628339_a_at	Mgat2	9.05596	10.8256	1.19541	0.00263008
1624379_s_at		8.80006	10.5194	1.19538	0.124833
1630866_at	RhoGAP18B	5.95341	7.11638	1.19535	1.31e-05
1629760_s_at		9.92989	11.8693	1.19531	0.0229382
1632203_at	CG31706	5.83456	6.97393	1.19528	0.248925
1630004_at	beat-Ib	6.73466	8.04948	1.19523	0.0239576
1632315_at	CG13035	2.79724	3.34308	1.19514	0.153203
1635538_at	CG11210	8.93886	10.6826	1.19508	2.45e-05
1629129_at	Tie	7.44488	8.89562	1.19486	0.0185321
1641681_s_at	CG5288	10.1616	12.1378	1.19448	0.000204
1623537_at		5.97107	7.13182	1.19439	0.106058
1638228_s_at		8.33677	9.95567	1.19419	0.0602188
1634567_at	gce	6.42513	7.67207	1.19407	0.00102273
1627574_at	CG4623	8.18174	9.76861	1.19395	0.00878921
1623605_a_at	cbt	10.0475	11.9956	1.19388	0.00105571
1634514_at	CG33258	5.12938	6.12373	1.19385	0.0477045
1639609_s_at	cpx	8.6971	10.3827	1.19381	4.06e-05
1634117_at	CG6204	7.76632	9.26946	1.19355	0.000120376
1640757_at	CG33462	4.09552	4.888	1.1935	0.0495315
1625036_at	CG18281	2.98083	3.5575	1.19346	0.02322
1640776_at	CG34269	5.03893	6.0133	1.19337	0.00367884
1624688_at	CG9360	7.67371	9.15621	1.19319	0.169358
1639176_at	CG1545	3.95024	4.71306	1.19311	0.035969
1633120_at		5.25726	6.27238	1.19309	0.00564616
1638764_at	CG13516	7.13977	8.51829	1.19308	0.0469069
1637507_at	CG32835	2.50599	2.9888	1.19266	0.0559819
1636275_a_at	Vmat	7.95481	9.48663	1.19257	0.00446171
1624839_at	h	8.81697	10.5143	1.19251	0.00469103
1632304_at	CG8026	6.1323	7.31259	1.19247	0.00680955
1640522_at		4.03713	4.81398	1.19243	0.00163037
1641156_at	dpr3	4.85967	5.79377	1.19221	0.000288506
1629776_a_at	Esyt2	9.23251	11.0069	1.19218	0.00541901
1631258_at	CG30005	8.02917	9.56682	1.19151	4.04e-06
1630345_at	CG32170	5.93467	7.07075	1.19143	0.0402994
1629346_at	CG1443	9.00528	10.7284	1.19135	0.0201526
1625388_at	CG4893	10.378	12.363	1.19127	0.00184534
1632746_at	DCX-EMAP	3.61159	4.30221	1.19122	0.00173541
1639129_at	Gr66a	4.22467	5.03214	1.19113	0.00820892
1625299_at	CG42313	3.21774	3.83223	1.19097	0.0430856
1638775_at	Mdr50	5.56746	6.63025	1.19089	0.271065
1636521_at	Thd1	8.54889	10.1807	1.19088	0.0716042
1637393_at	Vmat	8.69863	10.3569	1.19063	0.00946112
1626783_at	CG16756	6.15505	7.32803	1.19057	0.0552423
1635755_a_at	CG10741	9.15787	10.9026	1.19051	0.00021706
1632984_s_at	CG6503	6.361	7.57276	1.1905	0.0416132
1631432_at	CG42749	6.61053	7.86933	1.19042	0.122664
1623052_at		3.14934	3.74826	1.19017	0.00160078
1636191_a_at	CG16742	8.04313	9.57063	1.18991	0.0957358
1631805_at	CG3397	3.26347	3.88261	1.18972	0.180343
1639134_at		3.79555	4.51546	1.18967	0.00547085
1633146_at		3.07726	3.66092	1.18967	0.0269568
1635764_at	CG14696	8.9364	10.6291	1.18941	0.000129149
1623355_at	v	7.76272	9.23244	1.18933	0.0711912
1638004_at	Cbp53E	7.40987	8.80846	1.18875	0.0283996
1625992_s_at	NKAIN	8.48587	10.0867	1.18865	0.000482723
1640102_at	CG42686	4.55344	5.41219	1.18859	0.000393963
1624833_a_at	mAcR-60C	6.92985	8.23614	1.1885	0.0073754
1637154_at	CG7470	9.51232	11.3021	1.18815	0.00137575
1639805_at	psd	4.96517	5.89872	1.18802	0.0030891
1627438_at	CR31084	5.22749	6.20978	1.18791	0.0383525
1631013_at	mbc	10.4207	12.3772	1.18775	0.0441463
1624410_at	CG15658	9.48944	11.2707	1.18771	3.9e-07
1626319_a_at		8.81802	10.4732	1.1877	0.000610135
1625872_at	CG34021	4.13258	4.90757	1.18753	0.0434832
1641716_x_at		2.58806	3.07258	1.18721	0.00695428
1637792_at	Atf3	8.22177	9.7602	1.18712	0.0890855
1624265_at	l(1)G0196	7.57811	8.99415	1.18686	0.00210363
1630618_at	dys	5.4989	6.52612	1.1868	0.0881734
1633898_at		3.45405	4.09781	1.18638	0.00326271
1636386_s_at	CG34318	4.28052	5.07746	1.18618	0.0504589
1632348_at	CG9452	5.12949	6.08393	1.18607	0.162418
1635420_at	CG14760	5.80744	6.88762	1.186	0.0137364
1625780_a_at	CG9812	7.53994	8.94123	1.18585	0.0425159
1631610_at	CG31886	8.51072	10.0917	1.18577	0.0435302
1623559_s_at		8.87805	10.5244	1.18544	0.00205534
1626791_at	CG11406	4.39187	5.20615	1.18541	0.000223967
1638582_at	CG5321	8.83756	10.476	1.1854	0.00198494
1636477_at		4.50203	5.3363	1.18531	0.207441
1629535_at	CG14861	2.68433	3.18158	1.18524	0.00968034
1637287_at	CG42389	3.36613	3.98924	1.18511	8.86e-05
1631840_at		5.23956	6.20893	1.18501	0.00408422
1624711_at	CG31740	4.05885	4.80931	1.1849	0.0141575
1635469_at	CR18228	5.87714	6.96317	1.18479	0.186281
1636404_at	Mst35Bb	3.00597	3.56142	1.18478	0.0108293
1635375_at	CG5630	6.90397	8.17849	1.18461	0.0411799
1623757_at	Cry	4.27669	5.06508	1.18435	0.0998542
1628680_at	CG13581	4.22476	5.00296	1.1842	0.0950898
1626241_at	Cyt-c-d	7.41268	8.77583	1.18389	0.00145137
1625857_at	CG8451	8.70335	10.3009	1.18356	6.25e-05
1624290_at	CG4752	7.59256	8.9849	1.18338	0.0344787
1627129_at		7.7266	9.14331	1.18336	0.143688
1634458_at	CG31635	5.52696	6.54024	1.18333	0.00321433
1623026_a_at	CG7573	3.06104	3.6219	1.18322	0.0280435
1627701_at		4.61847	5.46448	1.18318	0.00109153
1625324_at	CG18549	10.232	12.1008	1.18265	1.27e-05
1633300_at	CG13282	6.26352	7.40729	1.18261	0.0102501
1638888_at	unpg	7.91112	9.35546	1.18257	0.00244247
1629697_a_at	beat-VII	4.14613	4.90197	1.1823	7.67e-05
1625185_at	CAH2	7.97873	9.43136	1.18206	0.0304829
1634749_a_at	CG32686	5.95924	7.04308	1.18188	0.192176
1632124_at		7.1166	8.41091	1.18187	0.0439136
1636829_at	Spn28Da	3.30293	3.90342	1.18181	0.00363488
1639938_at	CG12272	7.99864	9.45209	1.18171	0.00734887
1625756_at	CG6656	9.12367	10.7807	1.18162	3.69e-06
1640404_at	Vha14-2	5.90549	6.97657	1.18137	0.0131681
1625785_at	l(1)G0196	5.32605	6.29181	1.18133	0.00824002
1623092_at	Pcp	4.71906	5.57418	1.18121	0.0221599
1632155_at	CG13676	8.66788	10.2384	1.18119	0.0196304
1633866_at	Su(z)2	9.01589	10.649	1.18114	0.0837797
1628884_at	PGRP-SA	4.78455	5.6512	1.18113	0.0137622
1625491_at	bwa	11.0048	12.9978	1.1811	1.74e-05
1630173_a_at	CG15745	8.82421	10.4209	1.18094	9.88e-05
1638201_at	26-29-p	9.6566	11.4026	1.18081	0.000491768
1635789_at	CG42533	6.11155	7.21371	1.18034	0.0415107
1639803_at	CG5151	10.0168	11.8212	1.18013	0.000485644
1624273_at	CG8034	6.64593	7.84271	1.18008	0.0013683
1625270_at	CG31259	7.45544	8.79705	1.17995	0.0103688
1637028_at	SIFR	4.16907	4.91819	1.17969	0.230578
1636597_at	Osi13	5.23998	6.18124	1.17963	0.117648
1637385_a_at	CG9780	7.45967	8.79735	1.17932	0.0346719
1627016_at		5.01599	5.91531	1.17929	0.0890843
1628634_at	Papst2	9.77953	11.5319	1.17919	8.19e-07
1625810_s_at	CG13937	8.30276	9.78965	1.17908	0.0123974
1624520_a_at	ftz-f1	9.66674	11.3976	1.17905	0.00327801
1641005_at	TwdlBeta	9.05025	10.6706	1.17904	0.224646
1626897_at	HisCl1	5.21417	6.14739	1.17898	0.0106782
1628005_at	chinmo	9.95826	11.7403	1.17895	0.0367599
1638652_at	CG40006	9.38342	11.0625	1.17894	2.57e-05
1641186_at	Octbeta2R	4.37852	5.16193	1.17892	0.0186754
1640586_at	CG1537	3.87772	4.57143	1.1789	0.0893211
1627265_at	CG9139	9.09291	10.7185	1.17877	4.06e-06
1629216_at	CG32810	7.29023	8.59338	1.17875	0.00501267
1638125_a_at	msi	8.99528	10.6032	1.17875	0.0513444
1634588_at	Sema-1a	8.9099	10.4952	1.17792	0.0632687
1631700_at	Muc68Ca	3.23824	3.81388	1.17776	0.0563833
1626577_at	CG15556	6.13684	7.22753	1.17773	0.135357
1633573_a_at	att-ORFA	8.17954	9.63026	1.17736	0.00483513
1636392_at	CG42749	7.88178	9.27754	1.17709	0.118416
1637446_at		4.8662	5.72726	1.17695	0.000670153
1629309_at	CG7627	8.85876	10.4256	1.17686	3.77e-05
1626766_s_at	daw	7.4429	8.75825	1.17673	0.00754897
1636985_s_at	chinmo	4.87826	5.73997	1.17664	0.192389
1639528_at	NAAT1	4.77314	5.61486	1.17634	0.0148851
1635204_at	CG13568	6.00616	7.06527	1.17634	0.0830722
1625688_at	CG6293	8.47603	9.97017	1.17628	0.00942741
1623445_at	CG14095	8.81883	10.3719	1.17611	0.211172
1640962_s_at	CG4091	9.99858	11.7559	1.17576	9.83e-06
1632884_at	kibra	8.27997	9.73473	1.1757	0.0709464
1633410_at	CG2975	7.28601	8.56582	1.17565	0.119508
1625428_at	CG13707	8.15427	9.58659	1.17565	0.000215105
1641199_a_at	CG1544	8.70417	10.2325	1.17559	0.00308846
1627147_at	CG14644	4.32707	5.08667	1.17555	0.0284304
1635716_at	beat-VII	4.18733	4.9221	1.17547	0.000797185
1630841_at	CG8668	9.87669	11.6093	1.17542	2.22e-06
1626792_at		5.72165	6.72506	1.17537	0.0125889
1623002_at	CG31404	2.6307	3.09155	1.17518	0.100358
1632287_at	CG32113	8.25167	9.69644	1.17509	0.0545361
1641159_s_at		3.22345	3.78783	1.17509	0.0386211
1625042_at	CG31288	4.84124	5.68792	1.17489	0.175289
1640355_at	CG5246	4.07367	4.78497	1.17461	0.0237707
1639335_at		10.3737	12.1847	1.17458	0.0416292
1634406_at	CG32982	10.3098	12.1083	1.17445	3.73e-05
1635285_at	CG32461	3.29887	3.87387	1.1743	0.03112
1623899_at	Takr99D	4.51154	5.29768	1.17425	0.193145
1639529_at	CG9380	8.31816	9.76727	1.17421	0.00300956
1628982_at	NPFR1	6.70775	7.87552	1.17409	0.106156
1628622_s_at	CG3409	5.23921	6.15084	1.174	0.00778194
1638573_at	CG7140	3.85397	4.52359	1.17375	0.0101216
1625562_at	CG34168	3.00559	3.52762	1.17369	0.0744079
1626312_at		3.84181	4.50879	1.17361	0.0185831
1629269_at	CG32204	5.60812	6.58133	1.17353	0.0520929
1639319_at	skpF	3.9982	4.6913	1.17335	0.0228224
1635847_at	Vm26Aa	6.14553	7.20896	1.17304	0.00543303
1623118_s_at	CG4168	4.39406	5.15313	1.17275	0.000980039
1626890_at	CG11294	4.76509	5.58786	1.17267	0.00252247
1636934_at	zormin	6.25758	7.33733	1.17255	0.0217
1631190_at	CG8089	7.66958	8.99248	1.17249	0.0928257
1633587_at		3.09425	3.62771	1.17241	0.0236396
1625318_at		4.2527	4.98545	1.1723	0.0168889
1623772_a_at	mthl10	7.96456	9.33627	1.17223	0.00224352
1628640_at	CG14627	4.04183	4.73749	1.17212	0.00930041
1637261_at	Cp7Fc	3.7158	4.35533	1.17211	0.00476637
1625487_at	CG6839	4.39652	5.15255	1.17196	0.350639
1627170_at		3.39932	3.98325	1.17178	0.00711603
1626724_at	CG32687	8.10926	9.50037	1.17155	0.00178849
1630977_at	CG16771	7.8728	9.22253	1.17144	0.0117915
1623055_at	CG9254	5.70586	6.68324	1.17129	0.0230769
1625575_at	CG34402	3.33527	3.90634	1.17122	0.00223417
1633207_at	Ndae1	4.8068	5.62969	1.17119	0.00152166
1625012_s_at	vir-1	9.37503	10.9799	1.17118	0.000554277
1634370_a_at	pnr	9.6977	11.356	1.171	1.61e-05
1633943_at		5.8034	6.79515	1.17089	0.0905772
1628352_a_at	CG8798	10.332	12.097	1.17083	2.94e-06
1628173_at	CG17189	3.73478	4.3723	1.1707	0.02216
1637711_at	Ir60e	3.73307	4.3702	1.17067	0.0525223
1624587_at	CG13323	4.92145	5.76057	1.1705	0.379008
1635005_a_at	Rdl	6.5385	7.65321	1.17048	0.00723348
1637269_at	CG6310	11.3647	13.302	1.17047	1.38e-05
1624531_s_at		8.0611	9.43515	1.17045	0.0368762
1628936_at		4.04279	4.73185	1.17044	0.00834887
1637407_at	CG32243	9.69944	11.3508	1.17025	0.00053655
1627316_at		6.43075	7.52427	1.17005	0.0536589
1630192_at	CG32762	4.87769	5.70703	1.17003	0.00108076
1639943_at	Acox57D-p	9.57144	11.1975	1.16988	0.000560134
1638481_at	CG2736	8.9174	10.4322	1.16987	0.00124167
1626822_s_at		3.2718	3.82751	1.16985	0.0423326
1638207_at	CG15617	2.95119	3.45221	1.16977	0.05786
1632573_at	Mitf	7.18447	8.40403	1.16975	0.0939093
1629142_at	DopR	2.83327	3.31378	1.16959	0.0172538
1625574_at	Nos	5.66766	6.62826	1.16949	0.0946276
1639734_at	CG4017	6.30802	7.37621	1.16934	0.185751
1637499_s_at	CG5953	9.21464	10.774	1.16923	0.00064228
1638524_s_at		3.00311	3.51094	1.1691	0.0112245
1634806_at	nimB3	11.0411	12.9081	1.16909	0.00123146
1629559_s_at	Atet	10.5861	12.372	1.16871	5.5e-05
1633387_at	bves	9.42482	11.0146	1.16868	0.0697764
1638781_at	CG31913	5.22667	6.10778	1.16858	0.0116011
1623552_s_at	CG2893	9.65676	11.2846	1.16857	0.000161686
1624840_at	Acp29AB	3.67451	4.29382	1.16854	0.00667318
1631098_at	CG7194	7.68064	8.97418	1.16842	0.0979691
1625837_at	CG17244	7.31685	8.5486	1.16834	0.0693306
1632671_at		4.1781	4.88119	1.16828	0.00466267
1628100_at	CG42235	3.41506	3.98896	1.16805	0.113633
1629213_at		3.22427	3.76584	1.16797	0.00270925
1634640_at	Cyp4ac1	5.1386	6.00134	1.16789	0.218563
1641449_at	Dcr-2	9.02117	10.5357	1.16789	0.070463
1633049_at	CG11159	4.55403	5.31841	1.16784	0.18569
1633995_at	d	6.50501	7.59665	1.16782	0.00127043
1638950_at	dpr13	4.82877	5.63903	1.1678	0.168674
1633441_at		4.27223	4.98907	1.16779	0.0101541
1624826_at	CG8552	9.68152	11.3053	1.16772	0.0281797
1628899_at		4.74609	5.54166	1.16763	0.0184516
1632658_a_at	l(1)G0196	8.49233	9.91535	1.16757	0.0019188
1628219_at	CG32050	4.26749	4.98218	1.16747	0.000190467
1633685_at		4.43907	5.18239	1.16745	0.00799883
1625899_at		3.61584	4.22101	1.16737	0.0018208
1628536_s_at	CG11880	10.4151	12.1572	1.16727	3.58e-05
1633112_at	moody	9.34367	10.9057	1.16717	0.00985024
1629094_at		6.14512	7.16935	1.16667	0.00236487
1639826_at	CG43154	9.22595	10.7629	1.16659	0.00970916
1625445_s_at	shn	9.32625	10.879	1.1665	0.0909957
1623381_at		2.9612	3.45411	1.16646	0.03695
1631053_at	Sgs7	4.51104	5.26189	1.16645	0.186835
1638821_a_at	yuri	9.41409	10.9806	1.1664	0.0502644
1638700_at	Alk	4.87279	5.68345	1.16636	0.231728
1637949_at		3.32975	3.88366	1.16635	0.0335414
1628662_at	CG13531	9.46822	11.0431	1.16633	0.00150941
1637619_s_at	Dscam	9.5272	11.1096	1.16609	0.140724
1641022_a_at	Cyp18a1	8.20755	9.57002	1.166	0.00629872
1638360_at	Oatp26F	9.86602	11.5036	1.16598	0.000479626
1623714_at	CG8620	6.53758	7.62157	1.16581	0.10875
1639379_at		3.03006	3.53247	1.16581	0.0404325
1636244_s_at	CG5191	10.8035	12.5943	1.16576	1.01e-05
1632964_at	pirk	8.06783	9.40471	1.16571	0.00511082
1640236_at	CG4325	7.19343	8.38412	1.16553	0.00166063
1638656_at	CG8646	6.24411	7.27765	1.16552	0.0171303
1640521_at	CG6361	7.88653	9.19025	1.16531	0.04229
1623046_at	CG32727	2.70665	3.15408	1.16531	0.0751779
1626580_at	aft	8.75744	10.2029	1.16506	0.00212265
1628060_at		3.65876	4.26264	1.16505	0.000812512
1635680_at	CG30486	3.51798	4.0985	1.16501	0.00134119
1625722_at	CG2774	9.72069	11.3246	1.165	0.000173316
1635990_at	Or65b	3.46248	4.0337	1.16498	0.0240063
1634099_at	rdgB	6.88638	8.02229	1.16495	0.132984
1634297_at	Cyp318a1	5.72728	6.67192	1.16494	0.146069
1641538_at		5.25	6.11443	1.16465	0.13523
1624517_at	Ect3	11.0382	12.8543	1.16453	0.000382758
1623407_at	CG10298	5.68712	6.62242	1.16446	0.0452037
1637801_at	se	4.60349	5.36022	1.16438	0.00510872
1638405_at	CG9338	11.39	13.2601	1.16419	7.71e-06
1628988_at		6.8297	7.95028	1.16407	4.44e-06
1637558_at	ClC-b	9.87313	11.4923	1.164	9.65e-07
1639991_at		4.0844	4.75379	1.16389	0.00127556
1625486_a_at	PGRP-LA	8.40379	9.78089	1.16387	0.0717498
1637831_at		3.56602	4.1503	1.16385	0.00500021
1626301_at	Idgf3	7.78953	9.06426	1.16365	0.058198
1633359_a_at	Traf-like	9.75256	11.3478	1.16357	0.00337287
1637076_at	CG8861	5.71412	6.64867	1.16355	0.106817
1640760_at	CG17838	4.50168	5.23791	1.16355	0.195659
1629068_at		2.9019	3.37599	1.16337	0.0052264
1630595_at	CG17601	3.08853	3.59186	1.16297	0.00446321
1637378_s_at	IA-2	7.4707	8.68776	1.16291	0.0294354
1622987_at	Ir7g	4.97068	5.77934	1.16268	0.220206
1641619_at	CG34057	6.3279	7.35653	1.16255	0.0722677
1634731_at	Cyp4p3	3.69474	4.29506	1.16248	0.367377
1627201_at		4.14282	4.81529	1.16232	0.0251685
1641478_s_at		2.88273	3.35035	1.16221	0.00730959
1639620_at	CG13436	5.96094	6.92767	1.16218	0.001469
1627121_s_at	par-1	6.13016	7.1238	1.16209	0.000881569
1632418_s_at	pum	10.3946	12.0786	1.16201	5.97e-05
1635184_at		3.03114	3.52157	1.1618	0.00537862
1632766_at		4.10641	4.76907	1.16137	0.00588672
1641597_a_at	CG4297	5.04028	5.85138	1.16092	0.0250294
1637022_at	CG3532	7.68134	8.91723	1.16089	0.0541235
1640670_at	btl	8.62047	10.0074	1.16089	0.0219529
1631984_at	pex12	7.62305	8.84882	1.1608	0.00210938
1626914_at		2.80247	3.25269	1.16065	0.0199126
1625187_a_at	Sbf	9.18507	10.6603	1.16061	0.00685102
1622965_s_at	CG15617	3.30416	3.83478	1.16059	0.130828
1622964_at	CG34345	3.51697	4.0815	1.16052	0.00312642
1627785_at	Tsp42En	7.02991	8.15794	1.16046	0.248786
1639041_at		2.9049	3.37099	1.16045	0.0250647
1628133_at	CG5204	4.84568	5.62251	1.16031	0.0169684
1624821_at	CG8586	7.54931	8.75912	1.16025	0.10102
1626305_at		2.59427	3.00995	1.16023	0.0103736
1634425_at		4.47882	5.19602	1.16013	0.000203027
1637297_at	CG14052	5.05488	5.86413	1.16009	8.96e-05
1627329_at	mim	8.52483	9.88844	1.15996	0.00321701
1639944_at	Cyp9f2	10.6126	12.3088	1.15983	8.78e-06
1635870_at	CG1628	9.97272	11.564	1.15957	0.000749498
1625724_at	Pde1c	7.54049	8.74279	1.15945	0.000243892
1626165_at	Pde9	6.89443	7.99309	1.15936	3.41e-06
1629810_at	CG14340	3.12828	3.62627	1.15919	0.00834726
1636329_at	CG11333	4.38292	5.07991	1.15902	0.0368747
1623671_at		3.13401	3.63213	1.15894	0.00559502
1628895_at	ham	5.6685	6.56934	1.15892	0.000147878
1628684_at	Teh1	5.10275	5.91353	1.15889	0.150885
1631306_at	Ir52d	2.47809	2.8718	1.15888	0.00846136
1630765_at	CG15547	6.62514	7.67663	1.15871	0.00112978
1634135_at	CG12012	8.83927	10.2421	1.1587	1.93e-05
1639286_s_at	CG31689	9.32974	10.8078	1.15843	0.0159153
1628383_at	CG3330	3.48533	4.03707	1.1583	0.0042261
1639548_s_at		2.59006	2.99993	1.15825	0.0043521
1638341_s_at	Muc68Ca	3.53319	4.09194	1.15814	0.0406428
AFFX-r2-Bs-lys-M_at		2.81578	3.261	1.15811	0.0144941
1623961_at	Arpc3B	10.8108	12.5192	1.15803	0.000236029
1624538_at		3.13807	3.63387	1.15799	0.0334484
1628872_at	CG32351	3.54514	4.10493	1.15791	0.0048612
1625422_at	CG4925	8.23753	9.53811	1.15788	0.0513231
1624824_at	Jon74E	5.03528	5.83005	1.15784	0.573629
1631829_at	CG15719	2.97551	3.44502	1.15779	0.0139853
1629291_at		3.10736	3.59686	1.15753	0.0542178
1634188_a_at	tim	7.11939	8.23966	1.15736	0.000350123
1640770_a_at	Eip78C	7.42098	8.58764	1.15721	0.000572177
1640299_at	Edg91	6.06927	7.02279	1.15711	0.0699374
1630722_at		3.51128	4.06257	1.15701	0.000600689
1625986_at	CG31826	3.96617	4.58886	1.157	0.0356721
1637204_at	Ptp99A	8.99868	10.4096	1.15679	0.256442
1625463_at	ort	2.65448	3.06966	1.1564	0.0752128
1627595_at	Npc2g	11.3156	13.0829	1.15619	6.17e-05
1625664_at	CG14059	5.76358	6.66341	1.15612	0.0340211
1627167_a_at	CG40485	3.29313	3.80719	1.1561	0.480165
1630740_at	CG4363	3.92461	4.53707	1.15606	0.544064
1630401_s_at		3.33454	3.85469	1.15599	0.0771418
1638813_at	CG15499	4.17744	4.82895	1.15596	0.0145483
1637386_at	rdgC	6.74087	7.79213	1.15595	0.0108324
1627287_at	CG5966	9.37524	10.8371	1.15593	0.000497297
1636199_at	dpr15	4.40415	5.09087	1.15592	0.207066
1640668_s_at		3.17354	3.66755	1.15567	0.00443023
1625297_at	CG8128	7.21937	8.34286	1.15562	0.0299918
1630646_at	CG34345	2.95802	3.41832	1.15561	0.00794369
1627288_a_at	Cpn	3.05062	3.52515	1.15555	0.0545762
1627625_at		3.03556	3.50752	1.15548	0.000216518
1636729_at		4.01218	4.63595	1.15547	0.0162235
1639229_at	vkg	11.9	13.7499	1.15546	4.47e-05
1640884_at	CG15784	7.2161	8.33766	1.15543	0.041009
1625010_a_at	Gr97a	3.719	4.29673	1.15534	0.056972
1641110_at		4.21436	4.8686	1.15524	0.129224
1625477_a_at	CG4797	4.90977	5.67179	1.15521	0.194067
1635834_at	CG17169	6.04829	6.98675	1.15516	0.00765745
1626100_at	CG16723	3.38812	3.91276	1.15485	0.0343154
1637370_at	yellow-f	5.48833	6.33807	1.15483	0.0872746
1629518_at	CG2493	10.476	12.0978	1.15481	4.07e-06
1638626_a_at	CG17377	3.18914	3.68264	1.15474	0.0185166
1627887_at		3.0647	3.5386	1.15463	0.0550995
AFFX-Dm-Q9SFE5_at		2.36063	2.72545	1.15454	0.141434
1634546_at	Tig	12.1568	14.0349	1.15448	5.36e-08
1635159_at		3.27463	3.78049	1.15448	0.0016645
1633894_a_at	CG10543	8.54691	9.86551	1.15428	0.0172654
1624880_at	CG8813	4.10028	4.73268	1.15423	0.0574078
1627038_at	CG13992	4.06858	4.69608	1.15423	0.0458539
1622970_at	form3	9.27617	10.7065	1.15419	0.00136708
1641042_at	CG16820	6.30804	7.27999	1.15408	0.0990152
1638739_at	Cyp4ac3	7.77572	8.9738	1.15408	0.0171947
1625774_at	CG42345	3.59234	4.14583	1.15408	0.258518
1633797_at	Rh2	3.82583	4.41508	1.15402	0.0183863
1625510_at	Osi1	4.15416	4.79274	1.15372	0.000607566
1625529_at	CG42268	4.09233	4.7213	1.1537	0.00265629
1634855_s_at	CG9813	7.09738	8.18721	1.15355	0.011062
1629163_at	CG17764	4.90652	5.65948	1.15346	0.0309105
1625403_at	Or49b	2.30823	2.66241	1.15344	0.0208362
1633350_at		3.00634	3.46748	1.15339	0.00161646
1640381_at		5.47712	6.31708	1.15336	0.0135435
1632844_s_at	CG12004	9.91019	11.4299	1.15335	0.000320266
1631160_at		3.03649	3.5016	1.15317	0.0287328
1632450_at	CG13494	5.65949	6.52508	1.15295	0.0295116
1628406_s_at		8.76255	10.1024	1.15291	0.00924231
1630818_at	CG30178	5.27309	6.07906	1.15284	0.0304048
1640029_s_at	CG14669	3.12979	3.60793	1.15277	0.0026732
1632003_a_at	Ptp99A	8.4972	9.7947	1.1527	0.00893244
1633327_at	CG11023	4.68519	5.40043	1.15266	0.0186677
1639819_at	CG6385	9.25491	10.6675	1.15263	0.0204768
1633124_at	CG6026	9.03709	10.4155	1.15253	0.0665764
1634836_a_at	CG9317	5.6336	6.49283	1.15252	0.0116814
1638332_at	CG31926	3.02947	3.49099	1.15234	0.0741821
1636616_at	Or63a	3.44083	3.96472	1.15226	0.00841999
1635594_at	CG5255	6.25316	7.20508	1.15223	0.342249
1631691_at	CG16772	4.09176	4.71449	1.15219	0.0125802
1633133_at		5.01959	5.78274	1.15203	0.000547114
1640385_at		3.63044	4.18228	1.152	0.0113443
AFFX-r2-Bs-phe-5_at		2.97232	3.42384	1.15191	0.144038
1637692_at	GluClalpha	6.38526	7.35515	1.1519	0.213325
1626371_at	CG8507	10.7201	12.348	1.15186	0.0603267
1630487_s_at	Hsp67Bb	10.0244	11.5461	1.1518	0.0558487
1629079_at	CG15517	5.14475	5.92552	1.15176	0.370389
1624910_at	CG7653	3.50147	4.03258	1.15168	0.0426414
1630895_at	dpr11	4.74558	5.46485	1.15157	0.175711
1627619_at	CG15332	4.05469	4.66922	1.15156	0.00843168
1641507_at		4.8227	5.55346	1.15152	0.0051377
1623490_at	Ten-m	11.3104	13.0228	1.1514	0.037042
1629748_s_at	CG2747	9.07786	10.4518	1.15135	9.06e-05
1632146_a_at	CG5508	9.94772	11.4531	1.15133	0.000109425
1624806_at	yellow-g	4.96684	5.71816	1.15127	0.0377012
1633719_at	Ugt86Dg	3.70224	4.2619	1.15117	0.144201
1635533_s_at		3.1553	3.63218	1.15114	0.0577855
1626554_at	ps	9.00154	10.3615	1.15108	0.204775
1636907_at	CG32982	6.14145	7.06846	1.15094	0.037682
1634833_at	CG31369	8.18522	9.42032	1.15089	0.0699851
1629369_at	CG7457	7.35317	8.4625	1.15086	0.0540046
1636041_at		2.92525	3.36653	1.15085	0.00989896
1624094_at		3.33858	3.84191	1.15076	0.0297728
1628885_at	CG32698	4.73727	5.45148	1.15076	0.0056499
1641505_at		3.33508	3.8367	1.15041	0.00162789
1637461_at	CG9527	9.4555	10.8776	1.15039	0.00468837
AFFX-Dm-AJ002682-2_s_at		4.71373	5.42209	1.15028	0.182929
1634990_s_at		3.83188	4.40771	1.15027	0.00736794
1638184_at	CG13936	6.68465	7.68752	1.15002	0.000345894
1638660_at		3.44615	3.96312	1.15001	0.00695868
1625293_at		6.94642	7.98809	1.14996	0.336487
AFFX-r2-Bs-dap-5_at		2.74657	3.15814	1.14985	0.0118152
1623465_at	CG6138	4.50436	5.17859	1.14968	0.0260708
1624430_at	Or49a	3.03382	3.48767	1.1496	0.0629321
1641740_at	CG34370	3.12602	3.59349	1.14954	0.0865915
1635916_at		3.25331	3.73954	1.14946	0.00309263
1641322_at	Pde9	4.74906	5.45842	1.14937	0.0105677
1634815_at	CG31104	3.74665	4.30569	1.14921	0.4419
1638098_at	CG31954	6.6885	7.6864	1.1492	0.168248
1637345_at		4.95424	5.69138	1.14879	0.13742
1640413_at		4.67529	5.37047	1.14869	0.0628757
1631888_at	CG14718	3.20038	3.67595	1.1486	0.00687429
1634454_at	Bruce	8.64248	9.92663	1.14859	0.0349421
1637339_at	Ccap	5.97852	6.86658	1.14854	0.0217693
1629877_at	CG31683	7.52858	8.64629	1.14846	0.000889452
1634206_at	CG2124	9.55887	10.9774	1.1484	0.000840188
1640795_at	CG13280	5.27354	6.05603	1.14838	0.137655
1627653_at	l(1)G0469	8.9846	10.3177	1.14838	0.0346002
1627512_at	CG31915	11.3765	13.0641	1.14834	1.44e-07
1631277_at	alpha-Est4	7.84482	9.00795	1.14827	0.0464739
1640610_at	CG6613	8.59495	9.86848	1.14817	0.00165309
1633081_at	l(1)G0196	9.70701	11.1443	1.14807	0.00412756
1641045_at	Osi18	10.5506	12.1123	1.14802	0.0422182
1633061_at	Mgat2	8.85625	10.1669	1.14799	0.000339545
1624811_at		3.74169	4.29526	1.14795	0.00746146
1627760_s_at		3.40094	3.90368	1.14782	0.0222404
1641135_s_at		3.03829	3.48738	1.14781	0.0151572
1623701_at	CG30120	7.36073	8.44811	1.14773	0.0139819
1625831_at		3.38149	3.88102	1.14773	0.0180692
1631764_a_at	CG30115	9.61216	11.0314	1.14765	0.000135544
1635001_at	CG9727	3.75354	4.30775	1.14765	0.0325903
1633498_at	CG7188	7.39359	8.48522	1.14764	0.0142084
1622952_at	IM18	4.00665	4.59785	1.14755	0.0560664
1639218_s_at	CG15530	5.43445	6.23577	1.14745	0.0396666
1636391_at	CG15609	9.75955	11.1983	1.14742	0.0383879
1639301_at	CG4395	2.90785	3.33639	1.14737	0.00912338
1629352_at	sgl	10.5551	12.1103	1.14734	6.07e-05
1629398_at	CG10383	8.61208	9.88074	1.14731	0.00521952
1632437_at	CR31846	4.59979	5.27686	1.1472	0.135992
1629153_s_at	CG5991	10.1119	11.6001	1.14718	0.00102428
1634676_at		4.94265	5.66915	1.14699	0.0642142
1635792_a_at	Ela	7.71206	8.84561	1.14698	0.0851061
1632930_at	CG14506	3.74038	4.29014	1.14698	0.00443814
1627531_s_at		3.30106	3.78523	1.14667	0.0269507
1641240_a_at	CG1889	4.80212	5.50568	1.14651	0.0941775
1627176_at	CG31431	11.0606	12.681	1.1465	1.94e-07
1628444_at		6.31382	7.23846	1.14645	2.66e-05
1624818_s_at	Sply	10.0688	11.5424	1.14636	6.83e-05
1628229_at	Spn27A	10.4576	11.9872	1.14627	0.000240298
1633642_at		4.9583	5.68325	1.14621	0.042491
1634867_at	CG13169	3.96775	4.54702	1.14599	0.0538904
1639446_at	CG13243	3.0549	3.50066	1.14591	0.0489688
1638087_at	CG33523	7.27975	8.34141	1.14584	0.057321
1626052_at	MP1	10.4412	11.9624	1.14569	7.85e-06
1627515_at	CG10641	10.614	12.1594	1.1456	1.6e-06
1625139_at	Gadd45	6.61815	7.58078	1.14545	0.0789368
1635810_at	CG7806	9.34544	10.7041	1.14538	0.000324475
1629595_at		3.60005	4.1233	1.14534	0.000232486
1640131_a_at	CG5270	8.64674	9.90343	1.14534	0.000915357
1631665_at	Acp76A	2.61516	2.99523	1.14533	0.135427
1633199_at	Mst98Ca	3.72227	4.2632	1.14532	0.0147012
1633438_at		3.55488	4.07096	1.14517	0.0262377
1625396_at		3.631	4.1579	1.14511	0.00700872
1635217_at	Rgk2	3.4383	3.93701	1.14505	0.0166664
1626826_s_at	ng2	2.93475	3.36018	1.14496	0.0331452
1637353_at	Dat	9.04456	10.3552	1.14491	0.00691609
1632653_at	CG31555	5.15208	5.89827	1.14483	0.298017
1639707_a_at	CG4712	3.83426	4.38893	1.14466	0.00265634
1632751_at	CG34460	7.64889	8.75502	1.14461	0.000132037
1640626_at	CG42256	5.44737	6.23501	1.14459	7.76e-05
1632929_at		3.90227	4.46597	1.14445	0.0448534
1638212_at		3.93733	4.50609	1.14445	0.00784315
1639971_at	CG12224	3.3014	3.77826	1.14444	0.351861
1628908_at	Vha68-3	2.83288	3.2419	1.14438	0.0103479
1628257_s_at	PHGPx	10.8889	12.4609	1.14437	2.3e-05
1629895_at		4.63297	5.30159	1.14432	0.00146971
1639048_a_at	CG8229	9.19143	10.5176	1.14428	0.00102392
1627727_at		4.19738	4.80264	1.1442	0.000706244
1629323_at	Mur11Da	2.82891	3.23669	1.14415	0.0281432
1635962_a_at	CG12609	2.95391	3.37968	1.14414	0.000901264
1628262_a_at	zfh1	10.9157	12.489	1.14414	0.0468978
1638049_at	CG30494	3.69736	4.23011	1.14409	0.000925555
1623610_at	CG34357	3.75081	4.29117	1.14406	0.0277536
1633598_at	CG32221	7.56996	8.65997	1.14399	0.0206423
1630789_at	CG5897	3.79908	4.34562	1.14386	0.33008
1632715_at		6.54438	7.48478	1.1437	0.287909
1628528_at	jing	5.65951	6.4723	1.14362	0.00253594
1639407_at		2.66698	3.04996	1.1436	0.00954186
1637145_at	CG14787	8.27581	9.46376	1.14354	0.0291493
1622923_at	wrapper	10.0161	11.4536	1.14352	0.000336946
1624195_at	sug	9.85006	11.2637	1.14351	3.18e-06
1637177_at	gce	3.9115	4.47256	1.14344	0.0350497
1638392_at	Acp98AB	3.40164	3.88923	1.14334	0.0258529
1624678_at	CG9570	3.42747	3.91859	1.14329	0.00634209
1636511_at		4.89044	5.59114	1.14328	0.00962323
1640623_at	Or59a	3.70968	4.2412	1.14328	0.0101186
1628533_at	CG13578	6.45669	7.38126	1.1432	0.0711269
1639070_a_at	CG17944	3.64882	4.17126	1.14318	0.00340778
1628066_at		4.19794	4.79875	1.14312	0.00627333
1635360_at		7.80608	8.92303	1.14309	0.00975168
1635748_at	CG15322	3.46801	3.96394	1.143	0.0207339
1628600_at	CG12448	2.75285	3.14636	1.14294	0.00694932
1626598_at		3.53011	4.03455	1.1429	0.077281
1636966_s_at		4.2892	4.90211	1.1429	0.00741785
1626846_s_at	CG5973	11.0483	12.627	1.14289	1.02e-05
1639531_s_at		4.07223	4.65386	1.14283	0.0158226
1627750_at		4.8782	5.57469	1.14277	0.00566738
1638131_s_at	5-HT1A	6.28662	7.18378	1.14271	0.0286562
1627384_at	CG6225	8.2786	9.45961	1.14266	0.0130894
1630091_at	CG31296	2.773	3.1682	1.14252	0.0209123
1630367_at		3.35834	3.8368	1.14247	0.000499367
1629412_at		3.83796	4.38429	1.14235	0.068591
1632945_at	Msp-300	7.98412	9.12049	1.14233	0.00194835
1628510_at		3.37898	3.8598	1.1423	0.00362302
1624450_at	Orct	10.723	12.2479	1.14221	0.000142259
1625208_at	CG15393	6.10894	6.97765	1.1422	0.0415774
1634788_at	CG4872	8.00041	9.13792	1.14218	0.0337939
1640396_at		5.60563	6.4025	1.14215	0.107072
1625579_at		4.45831	5.09199	1.14214	0.0128729
1639880_at		3.01504	3.44358	1.14213	0.0150631
1633105_at		3.07224	3.50877	1.14209	0.076454
1624835_at	CG10869	4.45337	5.08589	1.14203	0.0573016
1639081_at		4.01157	4.58113	1.14198	0.0210836
1640625_at	CG34396	4.92837	5.62731	1.14182	0.17395
1637351_at	CG15631	3.7743	4.30952	1.14181	0.000940568
1639559_at	CG6431	5.53385	6.31817	1.14173	0.193431
1636173_s_at	Mpk2	8.40624	9.59712	1.14167	0.00817661
1634397_at		3.83391	4.37663	1.14156	7.29e-05
1635857_at	CG10919	3.00384	3.42906	1.14156	0.00344088
1634662_at	Cyp313a1	2.89616	3.30601	1.14152	0.0471524
1635038_s_at		3.22397	3.68011	1.14149	0.00296846
1630333_at	Cpr50Ca	3.004	3.42897	1.14147	0.341065
1624255_at		3.32667	3.79728	1.14147	0.0345836
1627315_s_at	Pld	9.71332	11.0869	1.14141	0.000390622
1624734_at		4.06744	4.64229	1.14133	0.0701156
1631843_at	CG6749	6.24082	7.12281	1.14133	0.00991305
1624190_at	CG31637	10.5821	12.0775	1.14131	4.64e-05
1624416_at		3.64872	4.16348	1.14108	0.00758134
1624393_at	w	8.05089	9.18659	1.14106	0.0143964
1625498_at	CG13590	3.21492	3.66836	1.14104	0.0123836
1634697_at	CG32667	8.76149	9.99706	1.14102	0.103731
1634120_at	Crtp	3.38017	3.85673	1.14099	0.0589192
1629704_at		3.60928	4.11809	1.14097	0.0192661
1624972_at		3.65693	4.17213	1.14088	0.0683615
1636389_at		4.56979	5.2135	1.14086	0.00397002
1623933_at	Sh	5.86302	6.68864	1.14082	0.390511
1626059_at	knrl	9.4241	10.7509	1.14078	0.159716
1640840_at	CG34353	5.2733	6.01567	1.14078	0.00726494
1640771_a_at	CG13627	10.2288	11.6687	1.14077	0.0324112
1636560_s_at		5.56124	6.34381	1.14072	0.141904
1623642_at	CG16723	2.8369	3.23591	1.14065	0.0937216
1632871_at		3.96791	4.52508	1.14042	0.00302438
1640214_at	Naam	8.06246	9.19427	1.14038	0.00217227
1626245_at		3.86829	4.41128	1.14037	0.0171476
1627373_at	Tsp42Eg	9.38986	10.7079	1.14037	0.070577
1632090_at	hale	4.0776	4.64986	1.14034	0.0112131
1630069_at	CG13728	6.36394	7.25689	1.14031	0.198215
1627533_at	stj	8.80353	10.0387	1.1403	0.00536131
1634933_s_at	CG17207	4.39557	5.01207	1.14026	0.00206244
1630643_at	ScpX	10.3067	11.7523	1.14025	0.000436614
1628263_s_at	CG15236	6.42123	7.32155	1.14021	0.0308032
1626995_at	CSN1a	2.84075	3.23898	1.14018	0.0458264
1639777_at		2.89878	3.30504	1.14015	0.0748876
1640812_at	Or85b	2.92148	3.33089	1.14014	0.00751965
1634708_s_at		3.96986	4.52599	1.14009	0.000432642
1639481_at	CG11629	3.45659	3.94071	1.14006	0.0445492
1623687_at	CG15199	6.1562	7.01768	1.13994	0.162966
1635199_at	rgn	6.25085	7.1248	1.13981	0.250504
1641611_at		3.40295	3.8787	1.1398	0.00090918
1626976_at		4.50346	5.13295	1.13978	0.00425789
1630285_at	RhoGAP100F	9.00268	10.2606	1.13973	0.26363
1633193_at	CheA29a	4.83507	5.51053	1.1397	0.00080079
1626427_a_at	Tequila	3.14889	3.58869	1.13967	0.212549
1634009_at	cp309	10.7041	12.1988	1.13963	0.0901279
1632427_at		2.75203	3.13625	1.13961	0.00901972
1641006_s_at	Pi3K68D	9.50668	10.8339	1.13961	0.0551988
1635787_at	CG15630	5.3457	6.09181	1.13957	0.0674078
1624728_at		3.2387	3.69015	1.13939	0.0168742
1636442_at	CG1999	2.81045	3.20208	1.13935	0.00222767
1626698_at	CG15543	4.01817	4.57809	1.13935	0.0336298
1638050_s_at	Sox14	9.3945	10.7029	1.13927	0.000534084
1633996_at		3.11408	3.54733	1.13912	0.0151542
1624316_at	CG9737	6.19439	7.05549	1.13901	0.41056
1625589_at	cbs	8.55119	9.73942	1.13896	0.00341272
1628468_at	CG8738	7.78969	8.87176	1.13891	0.0671899
1641145_at		3.03774	3.45963	1.13888	0.00768419
1631405_at		3.64376	4.14959	1.13882	0.107138
1624163_at		5.19131	5.91192	1.13881	0.0389009
1637420_a_at	GABA-B-R2	8.74332	9.95698	1.13881	0.00028025
1626172_at	CG12187	5.46061	6.21814	1.13872	0.113166
1623160_at	Mmp1	9.11249	10.3751	1.13856	0.030696
1624054_at	Adgf-A	10.8777	12.3835	1.13843	0.00580811
1626486_at	CG31815	3.04909	3.47101	1.13838	0.00103716
1639621_at	CG10916	9.72279	11.0682	1.13838	0.0018152
1640950_at	CG15739	9.54804	10.8691	1.13836	0.000251248
1627925_at	spict	9.55467	10.8766	1.13835	0.000290753
1625593_at		3.81196	4.33897	1.13825	0.0486794
1625996_s_at	BG642312	4.53896	5.16621	1.13819	0.410655
1641352_at	CG7922	6.86718	7.81594	1.13816	0.233246
1628632_at	Paip2	9.8485	11.2086	1.1381	0.135912
1637422_at	CG3246	11.1789	12.7217	1.13801	0.000147348
1627447_at	CG14759	3.42455	3.89713	1.138	0.000653482
1639866_at		4.07935	4.64215	1.13796	0.0141897
1635638_s_at	tomosyn	9.00975	10.2522	1.13791	4.06e-05
1627291_at	inx6	4.67751	5.32252	1.1379	0.00917376
1639793_at		2.98919	3.40136	1.13788	0.0391215
1637920_at		4.29897	4.89162	1.13786	0.00519741
1640639_at	CG42235	4.0627	4.62262	1.13782	0.0336895
1637333_at		3.98586	4.53473	1.1377	0.000111502
1635160_at	CG34434	3.56175	4.05179	1.13758	0.0085922
1637684_at	unc-104	9.20221	10.4682	1.13757	0.10523
1623220_at		4.59297	5.22433	1.13746	0.0512319
1628156_at		3.3611	3.8229	1.1374	0.0574583
1625983_at	CG18666	7.19747	8.18368	1.13702	0.0830421
1625693_at		3.12371	3.55133	1.13689	0.0279351
1638886_at	CG8319	8.55563	9.72577	1.13677	0.000908016
1631357_at		3.04579	3.46191	1.13662	0.145589
1635369_s_at		3.66525	4.166	1.13662	0.0301738
1628968_at	CG18469	3.31498	3.76785	1.13661	0.0627845
1634869_at	Thiolase	9.71505	11.0413	1.13651	0.00509887
1635738_at	Cng	6.6628	7.57224	1.1365	0.235259
1628953_at	CG7131	6.3415	7.20698	1.13648	0.181079
1633023_at	Acp70A	3.73144	4.24044	1.13641	0.0540663
1624034_at	Gr28a	3.28919	3.73738	1.13626	0.0237786
1627906_at		2.71327	3.08287	1.13622	0.0703127
1629590_at	Gr64c	3.04391	3.45846	1.13619	0.0361613
1633655_at		2.67472	3.03891	1.13616	0.00319281
1625241_at		2.59099	2.94373	1.13614	0.0166366
1637777_at	CG13982	4.6603	5.29467	1.13612	0.0123944
1623102_at	Gip	9.6654	10.9807	1.13608	0.0204599
1639257_s_at	CG11739	11.0264	12.5264	1.13603	8.48e-06
1630879_at		2.73929	3.11165	1.13594	0.00405063
1626504_at	prom	3.41657	3.88098	1.13593	0.0036463
1638408_at		2.83502	3.2202	1.13586	0.0454807
1638312_at	CG13189	10.3375	11.7415	1.13582	8.95e-06
1637757_at	CG10280	7.03769	7.99346	1.13581	0.373841
1626566_at	CG12262	10.7316	12.1887	1.13578	0.00108926
1637698_at	CG30340	7.55941	8.58549	1.13573	0.0021225
1629360_at	jdp	5.18491	5.88831	1.13566	0.157475
1634169_at		3.0928	3.51216	1.13559	0.0127074
1626396_s_at	Menl-1	2.95183	3.352	1.13556	0.00522302
1629069_at	CG7504	8.08474	9.18032	1.13551	0.046064
1624387_at	CG30372	10.0348	11.3939	1.13544	0.00126859
1623871_at	CG18563	4.98572	5.66077	1.1354	0.214267
1631678_at		3.04593	3.45799	1.13528	0.0909876
1624911_at	Cyp28d2	7.43918	8.44491	1.13519	0.170897
1638668_at		4.28641	4.8656	1.13512	0.000957449
1628120_at		2.87384	3.26197	1.13505	0.00898887
1625183_at	smi35A	10.5219	11.942	1.13497	0.0145271
1635757_at	laza	6.92696	7.8618	1.13496	0.136636
1625256_at		4.56754	5.1832	1.13479	0.0143603
1633906_at	CG6485	3.64938	4.14089	1.13469	0.00187187
1624192_at	r-cup	6.50789	7.38416	1.13465	0.0206919
1624120_at		3.04533	3.45514	1.13457	0.00556216
1632300_at		3.8253	4.33978	1.1345	0.00484752
1633211_a_at	mtsh	4.68663	5.31676	1.13445	0.00354493
1629553_at	CG14153	4.97236	5.6408	1.13443	0.277606
1624867_at	sick	5.92574	6.7223	1.13442	0.0861749
1635464_at		2.611	2.96185	1.13437	0.0391063
1634151_at		2.65375	3.01029	1.13435	0.0144867
1626233_at	CG8965	10.3908	11.7849	1.13416	0.000122239
1637591_at		3.16736	3.59223	1.13414	0.0793274
1627589_s_at	C1GalTA	10.528	11.9396	1.13408	2.37e-05
1624403_at	CG13071	3.42067	3.87928	1.13407	0.0557003
1633872_at	CG15673	7.24514	8.21567	1.13396	0.0442954
1635157_at	CG33057	11.1123	12.6008	1.13395	3.02e-06
1638242_at		4.04404	4.58566	1.13393	0.000314472
1637210_at		3.81709	4.32816	1.13389	0.04401
1635756_at	CG32039	8.11107	9.19652	1.13382	0.00323977
1624959_at		3.59962	4.08116	1.13378	0.0278832
1637371_at		3.04822	3.4559	1.13374	0.0159952
1633102_at	Ubc84D	5.76848	6.53938	1.13364	0.0265415
1626193_at		3.74547	4.24597	1.13363	0.00617704
1641415_at		3.68918	4.18204	1.1336	0.128636
1632714_at	CG15711	3.21488	3.64432	1.13358	0.0286229
1636629_at	CG13792	4.61316	5.22933	1.13357	0.0107577
1632698_at	ush	9.93889	11.2662	1.13354	0.00250205
1623597_s_at	CG17684	3.67644	4.16728	1.13351	0.134658
1632558_at	CG5630	7.10787	8.05671	1.13349	0.130191
1627368_at	CG15497	6.87309	7.78994	1.1334	0.231569
1624382_at		3.28496	3.72305	1.13336	0.0354474
1625691_at	Tre1	11.4327	12.9564	1.13327	1.11e-07
1631348_at		2.95143	3.34472	1.13326	0.0109399
1639073_at	CG10104	3.50712	3.97442	1.13324	0.0407228
1628259_at		5.20634	5.89998	1.13323	0.152198
1626913_at		2.86262	3.24396	1.13321	0.125975
1635589_at	CG7920	11.1763	12.664	1.13311	0.000166596
1636779_at		3.94685	4.47188	1.13302	0.00866686
1640028_at	CG34273	3.5021	3.96775	1.13296	0.0400967
1629178_at	CG30181	5.65488	6.40669	1.13295	0.125747
1640988_at	CG14339	3.77867	4.28098	1.13293	0.0205893
1638409_at	Gale	11.3343	12.841	1.13293	7.97e-05
1631124_at		3.4686	3.92951	1.13288	0.00201169
1631783_at	CG4267	5.64377	6.3935	1.13284	0.163992
1637734_at	TepI	3.16845	3.58933	1.13284	0.0529894
1629982_at		3.73082	4.22624	1.13279	0.0970177
1629699_at	CG15311	3.68361	4.17262	1.13275	4.27e-05
1632416_at		3.30377	3.74235	1.13275	0.0013016
1628759_a_at	CG14073	9.88064	11.1921	1.13273	0.0773293
1631529_at	Ser12	2.50414	2.83648	1.13272	0.151732
1627634_at	CG15098	10.2176	11.5735	1.1327	0.0022656
1632477_s_at	CG31708	5.79963	6.56871	1.13261	0.104255
1626691_at		2.694	3.0512	1.13259	0.0161933
1636321_s_at	CG13624	8.2914	9.39067	1.13258	0.130427
1636216_at	brp	6.4606	7.31694	1.13255	0.0405391
1637687_at		9.1335	10.3439	1.13252	0.181358
1633239_at	r-cup	3.12241	3.53607	1.13248	0.00522588
1629105_at	CR16735	2.94373	3.33368	1.13247	0.253574
1624816_at		9.17897	10.3947	1.13245	0.036153
1631386_at		5.17143	5.85632	1.13244	0.00443063
1639597_at	Obp44a	9.7526	11.0439	1.1324	0.11749
1632989_a_at	mth	10.7353	12.1553	1.13227	1.09e-05
1635191_at	Tsp42Ed	10.2952	11.6568	1.13225	4.21e-06
1625401_at	CG13026	3.75578	4.25247	1.13225	0.00402987
1640063_at		4.26754	4.83178	1.13222	0.00923107
1638936_s_at		4.51727	5.11442	1.13219	0.00775998
1631353_at	ng4	2.87793	3.25804	1.13208	0.189671
1627309_at		5.11739	5.79211	1.13185	0.00277938
1640519_at		4.5354	5.13321	1.13181	0.0601151
1637253_s_at	CG17570	5.1315	5.80724	1.13168	0.000345272
1627451_at	CG14538	3.1484	3.56288	1.13165	0.0267484
1632911_at	CG33493	8.85713	10.023	1.13163	0.0457951
1623426_at	CG31633	8.07576	9.13813	1.13155	0.00259175
1631205_a_at	CG6084	11.6705	13.205	1.13149	0.00597776
1640615_at		3.57424	4.04413	1.13147	0.0278239
1637976_at		3.98935	4.51364	1.13142	0.0439228
1637968_at		2.90066	3.28187	1.13142	0.0124293
1641201_at	CG5267	4.31314	4.87993	1.13141	0.0750094
1640732_s_at	CG33791	7.67159	8.67959	1.13139	0.00751254
1638403_at	CG17856	3.2325	3.65716	1.13137	0.0626306
1640264_at	CG34376	8.13293	9.20136	1.13137	0.00231652
1630987_at	BG4	8.16686	9.23935	1.13132	0.000689311
1628840_at	ken	10.8066	12.2239	1.13116	0.000498815
1628564_at	Spn43Ad	4.71447	5.33227	1.13104	0.265431
1631842_at		3.05451	3.45467	1.13101	0.0132238
1632926_at	CG33639	3.21028	3.63082	1.131	0.0203982
1641363_at	CG3517	4.83723	5.47055	1.13093	6.92e-05
1635228_s_at		4.23256	4.7866	1.1309	0.00364205
1626090_at	pigs	10.4847	11.8566	1.13085	0.0283865
1639100_at		4.91925	5.56278	1.13082	0.0132734
1624270_at		3.01981	3.41453	1.13071	0.0070084
1627963_s_at	Hsc70-1	7.56266	8.5509	1.13067	0.206748
1637580_at	CG14000	2.97761	3.36668	1.13066	0.0567645
1634556_at		4.67897	5.28971	1.13053	0.00166214
1629534_at	CG18568	4.25136	4.80624	1.13052	0.0797217
1638255_at		3.41935	3.86554	1.13049	0.0420423
1636103_a_at	cu	10.0587	11.3712	1.13048	0.00306919
1631449_at		5.15268	5.82483	1.13045	0.000663016
1629179_at	CG9465	3.49357	3.94909	1.13039	0.0987649
1631789_at		3.8883	4.39527	1.13038	0.106412
1624162_at		3.67868	4.15815	1.13034	0.0125933
1639497_at		3.80473	4.30049	1.1303	0.0328872
1636480_at		4.38235	4.95337	1.1303	0.0057935
1628408_at	CG34041	2.45326	2.77284	1.13027	0.114598
1629016_s_at	unc-13-4A	6.05667	6.84564	1.13026	0.00237987
1635651_at	CG30195	9.99772	11.3	1.13026	0.0199891
1627321_x_at	GS	5.21223	5.89115	1.13026	0.0199249
1637518_at	CG9314	4.11051	4.64579	1.13022	0.0177172
1636424_s_at		3.14015	3.54898	1.1302	0.0653203
1628644_at	CG17350	7.38123	8.34216	1.13019	0.16215
1633875_at		4.2155	4.76405	1.13013	0.00746516
1627425_at		3.74461	4.23176	1.13009	0.0184316
1640031_at	Acer	11.6948	13.2144	1.12995	1.27e-07
1637161_s_at	myoglianin	4.80088	5.42461	1.12992	0.113007
1629526_at		3.85779	4.35889	1.12989	0.0485887
1641127_at	CG34139	3.18637	3.60014	1.12986	0.0201167
1635166_at	CG34400	6.657	7.521	1.12979	0.0443085
1638761_at		3.63271	4.10415	1.12978	0.0650987
1634363_at		3.29793	3.7259	1.12977	0.0182499
1630188_at		4.66998	5.27562	1.12969	0.157042
1634424_at		3.04792	3.44312	1.12966	0.171305
1628215_s_at	kuz	10.7663	12.1622	1.12965	0.0348439
1631855_at	CG10864	5.17871	5.85011	1.12965	0.0173652
1625435_at	Mgat2	2.74879	3.1051	1.12962	0.0177578
1624536_at		3.0298	3.42247	1.1296	0.0768777
1625018_at		8.56876	9.67907	1.12958	0.322652
1628909_at	CG9686	4.67182	5.27706	1.12955	0.347615
1640402_at	CG6696	9.47036	10.6971	1.12953	0.0820909
1634575_at	CG11037	2.6245	2.96445	1.12953	0.0885806
1633775_at	CG31665	7.48012	8.44878	1.1295	0.0194197
1640718_at		2.85201	3.22133	1.12949	0.0801353
1634804_at	CG42533	9.4746	10.7013	1.12948	0.0585189
1624625_a_at	CG17150	3.88407	4.38691	1.12946	0.0587016
1638221_at	Obp83cd	7.26419	8.20409	1.12939	0.163059
1628771_s_at	CG32700	6.74847	7.62125	1.12933	0.0845729
1630993_at	CG31414	7.67428	8.66679	1.12933	0.0130182
1630427_at		3.98006	4.4944	1.12923	0.0186634
1641216_at		3.82548	4.31982	1.12922	0.00678228
1626097_at		4.54993	5.13782	1.12921	0.052677
1625448_at		2.5309	2.8578	1.12917	0.00430986
1628302_at	CG13748	7.39786	8.35307	1.12912	0.246745
1631374_at	chico	8.98634	10.1462	1.12907	0.141244
1633818_at	CG7368	3.9449	4.45403	1.12906	0.0163399
1639325_at		3.76978	4.25613	1.12901	0.0762028
1626161_at		4.47053	5.04697	1.12894	0.00907894
1623247_at	CG10420	9.19037	10.3747	1.12887	0.000160306
1636767_at	LysP	2.49956	2.82149	1.1288	0.100993
1636595_a_at	CG13138	2.5748	2.90633	1.12876	0.0811304
1631152_at	Trxr-2	3.64247	4.11147	1.12876	0.0225244
1629200_at		6.52938	7.36975	1.12871	0.000429832
1626929_at	Cht8	3.41831	3.85819	1.12868	0.0591009
1623039_at	CG3409	10.5291	11.884	1.12868	0.00235003
1634601_at	CG9684	9.44095	10.6554	1.12864	0.0508456
1630510_at		4.45321	5.02597	1.12862	0.000124264
1641747_s_at	Atf6	9.5125	10.7351	1.12853	0.0549787
AFFX-ThrX-M_at		2.7588	3.1133	1.1285	0.0280118
1624238_at		5.20269	5.87104	1.12846	0.00011488
1638325_at	Hn	9.51251	10.7344	1.12845	0.00307858
1639696_at	CG43078	4	4.51331	1.12833	0.0261132
1626668_at		4.42646	4.99441	1.12831	0.00633384
1638712_at	CG34230	3.104	3.50219	1.12828	0.100934
1638689_s_at		3.77882	4.26329	1.12821	0.000995848
1629237_at	Mes2	5.56432	6.27696	1.12807	0.11166
1639519_at	CG5850	10.6766	12.0437	1.12804	9.5e-06
1640678_at		2.75119	3.10324	1.12796	0.00772879
1631484_at	CG15475	4.33458	4.88894	1.12789	0.131969
1632218_s_at	CG42313	4.51202	5.08892	1.12786	0.0394385
1631317_at	Or82a	3.32099	3.74557	1.12785	0.099041
1628647_at	a5	3.80095	4.28685	1.12784	0.138621
1628113_at	Fili	6.02828	6.79824	1.12773	0.00159769
1627741_at	CG13086	6.3278	7.13563	1.12766	0.0495584
1624929_at	CG31710	9.65922	10.8917	1.1276	0.000137574
1637633_at	Pink1	4.61532	5.20419	1.12759	0.0233498
1624961_at	CG6380	3.41988	3.85588	1.12749	0.0577178
1631582_at		3.37358	3.80366	1.12748	0.104716
1639291_at		4.20566	4.74181	1.12748	0.0547
1641679_at	CG8765	2.99151	3.37274	1.12744	0.00760326
1641403_at	CG14967	9.88483	11.1442	1.12741	0.013781
1635819_at	sty	11.1397	12.5575	1.12727	0.00611017
1639740_a_at	CG32548	8.64395	9.74395	1.12726	0.297011
1636185_at	kay	4.56231	5.14276	1.12723	0.0983985
1635629_at	CG34274	2.74562	3.0947	1.12714	0.219756
1635753_s_at	CG12362	2.88588	3.25278	1.12713	0.0016867
1631150_at	Or85c	2.61903	2.95184	1.12707	0.0629827
AFFX-Dm-U89963-1_s_at		4.82247	5.43525	1.12707	0.0042606
1639074_at	CG33275	10.3097	11.6195	1.12705	2.77e-05
1633509_at	CG32720	4.07482	4.59247	1.12704	0.0155217
1637126_at	CG4983	2.44654	2.75726	1.127	0.031637
1633005_at	CG6903	9.00023	10.1428	1.12694	0.00717334
1634360_at		3.25563	3.66891	1.12694	0.0466904
1630028_at	p53	2.97454	3.35207	1.12692	0.103442
1630591_at		5.16775	5.82352	1.1269	0.0011857
1635735_at		4.82114	5.43291	1.12689	0.0103555
1639911_at	CG17029	9.81494	11.0596	1.12681	0.0120579
1631716_at	CG2709	5.39268	6.07647	1.1268	0.00260195
1628484_at		3.83198	4.31768	1.12675	0.00921212
1627829_at	Rh3	3.98812	4.49346	1.12671	0.000538258
1636825_at	CG3492	3.6523	4.11506	1.1267	0.00545088
1625214_at	Jupiter	7.77256	8.75737	1.1267	0.0410404
1624198_at	CG12582	9.93114	11.1893	1.12669	0.000547554
1623563_at		2.95927	3.33407	1.12665	0.0194811
1629424_at	CG42323	3.87528	4.36591	1.12661	0.0433014
1641677_at	slbo	11.1458	12.5568	1.12659	0.00164175
1628859_at	shi	8.39684	9.45973	1.12658	0.042337
1637373_at		3.13059	3.52684	1.12657	0.0685382
1626099_s_at	fray	9.23852	10.4078	1.12656	0.0137437
1626148_at	CG32110	5.77634	6.50721	1.12653	0.0428855
1630152_at	dpr3	4.58905	5.1697	1.12653	0.000510362
1635728_a_at	ps	9.5567	10.7659	1.12653	0.00894153
1641333_s_at	prominin-like	10.6501	11.9972	1.12648	0.0215926
1640013_at		4.08784	4.60457	1.12641	0.0513236
1641143_s_at	tsl	9.39077	10.5778	1.1264	0.000928
1626543_at	Sbp2	9.40277	10.5908	1.12635	0.12498
1622896_at	pinta	9.36781	10.5514	1.12635	0.0248637
1624853_at	CG11635	4.0587	4.57143	1.12633	0.0626375
1628366_at	CG31065	6.50475	7.32609	1.12627	0.000388692
1632831_at		3.86971	4.3582	1.12624	0.00501351
1633101_at		2.63538	2.96792	1.12618	0.0577319
1633231_a_at	Trf2	10.07	11.3398	1.1261	0.097369
1640114_at		2.56498	2.88832	1.12606	0.0751261
1630738_s_at	Pten	8.26928	9.31152	1.12604	0.139436
1626968_at	cert	9.35708	10.5354	1.12593	0.0102339
1628209_at		3.5995	4.05267	1.1259	0.0248566
1633099_at	CG3876	8.00343	9.01081	1.12587	0.000988206
1634496_at	CG32232	2.68276	3.02033	1.12583	0.117044
1629870_at	CG3687	3.44552	3.87879	1.12575	0.0522415
1636641_at		4.44764	5.00667	1.12569	0.0265426
1638793_at	CG31406	3.86151	4.34583	1.12542	0.393655
1627042_at		4.0648	4.57451	1.1254	0.0114466
1637646_at		3.6263	4.08048	1.12525	0.064075
1632126_at		2.9541	3.32398	1.12521	0.0308659
1631804_s_at	CG31369	9.52738	10.7191	1.12508	0.0730015
1636913_at	CG13120	3.38921	3.81289	1.12501	0.0522532
1630426_at		3.2374	3.64182	1.12492	0.0139937
1638344_at	CG5287	9.86581	11.0972	1.12481	1.47e-05
1633545_at	PGRP-SD	7.41263	8.33667	1.12466	0.18689
1624007_at	CG6304	2.726	3.06561	1.12458	0.029935
1636014_at	CG31419	3.88859	4.37301	1.12457	0.0376967
1625868_at		4.5635	5.13115	1.12439	0.0196949
1631656_at		3.86819	4.34911	1.12433	0.0145229
1633684_at	CG32444	8.12108	9.13076	1.12433	0.0112443
1641427_at	foi	10.124	11.3824	1.1243	0.000141428
1637231_s_at		4.38227	4.92681	1.12426	0.0221523
1634395_at	yellow-g2	4.22463	4.74945	1.12423	0.0869636
1623430_at	Phm	10.1471	11.4076	1.12422	4.73e-05
1631033_s_at		4.49005	5.04764	1.12418	0.0169783
1638960_at		3.3312	3.74483	1.12417	0.0131473
1623178_at	CG14190	2.96503	3.33307	1.12413	0.0295332
1627861_s_at	Aldh-III	11.2509	12.6464	1.12404	1.06e-05
1639679_at	5PtaseI	6.29287	7.07317	1.124	0.0257126
1623241_s_at	CG30104	4.12939	4.64139	1.12399	0.246809
1625846_at	CG12439	3.227	3.62705	1.12397	0.0346235
1626655_at	bnk	3.43615	3.86204	1.12394	0.101101
1629240_at	MstProx	4.87549	5.47972	1.12393	0.00158525
1623969_at	CG31200	3.65489	4.10753	1.12384	0.0891972
1636827_at		3.70269	4.16124	1.12384	0.00379995
1630810_at		3.16051	3.55188	1.12383	0.00571687
1630065_at	CG6912	7.75069	8.70988	1.12375	0.317001
1635534_at		3.99199	4.48598	1.12374	0.0423196
1625936_at		3.1302	3.51752	1.12374	0.0848485
1632716_at	CG5509	7.29192	8.19367	1.12366	0.248828
1629615_at	aust	3.66157	4.11417	1.12361	0.0837917
1635497_at		3.29833	3.70601	1.1236	0.00508939
1624250_at	CG32432	4.84708	5.44613	1.12359	0.0712049
1628675_at	Caps	8.57222	9.63112	1.12353	0.279639
1641372_at	CG42271	9.83218	11.0466	1.12351	0.000867258
1625097_at		3.79652	4.26524	1.12346	0.0110491
1623311_at	CG34127	4.04502	4.54427	1.12342	0.00252184
1630986_s_at	Adk3	9.60972	10.7957	1.12341	0.00023324
1641164_s_at	CG11163	10.1195	11.3682	1.1234	1.93e-05
1631301_at	CG30398	4.64431	5.21729	1.12337	0.0294205
1636849_at	CG8858	7.85975	8.82909	1.12333	0.00391787
1635897_at	CG15399	3.9267	4.41098	1.12333	0.0370035
1640989_at	CG12811	11.0739	12.4392	1.12329	6.39e-05
1628696_at	CG12643	9.70645	10.9029	1.12327	0.1352
1634718_at	CG7963	3.50308	3.93487	1.12326	0.0574229
1633563_at	CG1637	9.9151	11.1371	1.12325	0.000182308
1623636_at	Obp19a	3.04528	3.42057	1.12323	0.0147639
1630210_at	CG13027	4.4773	5.0288	1.12318	0.0230669
1634002_at	CG13315	11.6429	13.0771	1.12318	5.01e-05
1628039_at		4.38026	4.91959	1.12313	0.0120394
1637421_at	Cht2	9.35431	10.5061	1.12312	0.0254923
1624401_at		3.04986	3.42527	1.12309	0.0260789
1628777_at	CG12140	9.97132	11.1984	1.12306	0.00148005
1626625_at		4.68508	5.26162	1.12306	0.00370945
1639050_at		3.64681	4.09538	1.123	0.0177603
1633205_at	DAT	6.70223	7.52659	1.123	0.199015
1638629_at	Cda9	4.93839	5.54552	1.12294	0.37663
1623813_at	CG33307	6.65312	7.47086	1.12291	0.097069
1633857_at	CG13659	4.89724	5.4984	1.12276	0.167442
1629992_at		3.12887	3.51273	1.12268	0.0449679
1629502_at	CG31358	4.21587	4.73307	1.12268	0.0141575
1635862_at	CG33120	6.69472	7.51554	1.12261	0.0194283
1640144_at	CG18067	4.77104	5.356	1.12261	0.0399697
1640788_at		2.91935	3.27727	1.1226	0.0464739
1632682_at		3.31174	3.71749	1.12252	0.0122053
1625098_at		3.68639	4.13794	1.12249	0.00231158
1623371_at	CG42249	2.88026	3.23282	1.12241	0.0143798
1628024_at		4.48108	5.02938	1.12236	0.00688932
1628994_at		2.89192	3.24569	1.12233	0.0256167
1633919_s_at	l(3)mbn	3.08462	3.46164	1.12223	0.0297356
1630407_at	CG1724	4.17627	4.68651	1.12218	0.000296321
1631346_a_at	CG30412	3.01965	3.38843	1.12213	0.0269494
1639146_at		3.4528	3.8744	1.1221	0.0412567
1628682_at	CG5577	5.60841	6.29314	1.12209	0.188004
1636892_at	upd3	4.0122	4.50191	1.12205	0.0157486
1641242_at	Ugt86Di	3.86068	4.33188	1.12205	0.0163441
1639292_at	Frq1	7.67299	8.60945	1.12205	0.28534
1631583_at		2.83666	3.18283	1.12203	0.144529
1627422_at		3.40022	3.81497	1.12198	0.0462355
1627307_at	CG5681	2.68796	3.01582	1.12197	0.037453
1631708_at		3.95651	4.43876	1.12189	0.000223929
1631300_at	Cyp18a1	9.66653	10.8447	1.12188	0.00513056
1628287_at		3.72124	4.17461	1.12183	0.0185237
1634610_at	CR33963	7.8618	8.81919	1.12178	0.0292513
1634892_at	CG15865	4.03009	4.5205	1.12168	0.279594
1638662_at		4.40292	4.93868	1.12168	0.0119131
1623878_at	CG6123	3.35973	3.76845	1.12165	0.172103
1638961_at	CG42534	3.84331	4.31055	1.12157	0.00127032
1631962_at	MtnD	6.93834	7.78181	1.12157	0.404433
1623064_at		3.75738	4.21407	1.12155	0.0102628
1623528_a_at	CG31784	2.85014	3.19641	1.12149	0.00565691
1632229_at		3.45993	3.88019	1.12147	0.0252332
1634744_at		3.73849	4.19231	1.12139	0.00581895
1639859_at	CG15753	5.69055	6.38058	1.12126	0.0106953
1641241_at		7.88431	8.84016	1.12123	4.85e-05
1628470_s_at		4.80429	5.38643	1.12117	0.0192723
1629542_at	CG31821	7.61058	8.53232	1.12111	0.147209
1625350_at	Ddr	4.9734	5.57564	1.12109	0.0152822
1629385_s_at	Pmi	9.05587	10.1515	1.12098	0.126561
1635386_s_at		5.39086	6.04265	1.12091	0.013677
1641378_at	phtf	10.2129	11.4469	1.12083	0.00997978
1634433_at	scu	10.4395	11.7008	1.12082	0.00263357
1628944_at	CG13634	6.89513	7.72803	1.1208	0.135071
1633093_at	CG12983	2.86861	3.21508	1.12078	0.144542
1639912_x_at		3.71224	4.16052	1.12076	0.183436
1629671_at	CG14193	7.43007	8.32724	1.12075	0.00105619
1637501_a_at	CG1835	6.39539	7.16755	1.12074	0.136202
1639549_at		2.89476	3.24402	1.12065	0.0541163
1635071_at	CG14950	4.79095	5.36898	1.12065	0.00763787
1626873_a_at	CG12448	2.65907	2.97977	1.1206	0.143566
1629979_at		3.06242	3.43151	1.12052	0.00119778
1639137_at		2.7184	3.04599	1.12051	0.000314877
1624941_at	Brca2	7.40163	8.29353	1.1205	0.258773
1628228_at	CG4218	3.80779	4.26657	1.12048	0.06017
1638431_at	CG2911	10.4184	11.6734	1.12046	5.26e-07
1636261_at	ps	5.3474	5.99148	1.12045	0.00436728
1631528_at		4.53607	5.08236	1.12043	0.0335993
1631183_at	RhoL	11.5287	12.917	1.12042	1.08e-06
1627687_at	CG14101	4.24046	4.75106	1.12041	0.014851
1625442_a_at	shi	9.10539	10.2017	1.12041	0.0099021
1638921_at		4.1116	4.60657	1.12038	0.0095074
1634058_at		3.64354	4.08191	1.12031	0.0195833
1637694_at		3.02473	3.38864	1.12031	0.0223813
1627699_at	CG14070	2.76125	3.09346	1.12031	0.0775736
1628939_at		3.03957	3.40524	1.1203	0.0884008
1624958_a_at	CG8851	3.29469	3.69097	1.12028	0.128511
1638502_at		2.90951	3.25933	1.12024	0.0279789
1640662_at		4.85556	5.43932	1.12022	0.00604064
1625896_at		4.6068	5.16025	1.12014	0.00898302
1639345_at		2.93652	3.28926	1.12012	0.0269158
1632706_at	CG13054	3.41321	3.82311	1.12009	0.00411968
1638491_at	CG15831	2.76035	3.0918	1.12008	0.0929359
1627584_at		4.14516	4.64283	1.12006	0.066521
1626202_at		4.33801	4.85874	1.12004	0.0363962
1632407_at	Tre	4.98153	5.57888	1.11991	0.0106931
1629092_at		3.48325	3.90084	1.11988	0.0133181
1624087_at		5.5687	6.23602	1.11983	0.00204345
1628438_at	CG9044	9.40803	10.5345	1.11973	0.0350291
1634914_at		3.3331	3.73202	1.11968	0.0514491
1634222_at	CG18596	8.75762	9.80564	1.11967	0.105573
1639340_at		3.35714	3.75882	1.11965	0.0136273
1641367_at		7.08664	7.93411	1.11959	0.307408
1626484_at		6.13175	6.86493	1.11957	0.00257209
1633267_a_at	CG12970	3.47583	3.89109	1.11947	0.0630663
1639202_a_at	CG7023	9.83263	11.0072	1.11945	7.84e-05
1624810_at	Muc4B	3.48692	3.90333	1.11942	0.000100914
1627543_at		3.28421	3.67628	1.11938	0.146384
AFFX-Dm-U89963-1_x_at		4.15546	4.65133	1.11933	0.00235787
1637552_s_at	shep	10.3835	11.6223	1.11931	0.137227
1635085_at		3.30885	3.70338	1.11923	0.0253623
1635167_at		3.04081	3.40319	1.11917	0.0588169
1627633_at	CG42235	3.38186	3.78482	1.11915	0.0263307
1637690_at	CG10357	2.57465	2.88136	1.11913	0.02415
1623888_at	Clbn	8.87479	9.93154	1.11907	0.14552
1626677_s_at		3.86804	4.32826	1.11898	0.0272968
1636554_at		3.32283	3.71811	1.11896	0.0573841
1633177_at		3.76709	4.21511	1.11893	0.0567155
1639031_at		4.58272	5.12774	1.11893	0.0294211
1636880_s_at	cpx	8.93664	9.99856	1.11883	0.140379
1635129_at	CG6332	4.21484	4.71566	1.11882	0.029206
1626836_at	nub	4.8793	5.45899	1.11881	0.000812129
1638738_s_at	ced-6	10.7707	12.0501	1.11878	1.85e-05
1638708_s_at	gpp	9.39813	10.5144	1.11878	0.0861696
1635954_at	lva	9.79368	10.9568	1.11876	0.0338636
1633864_at		2.75491	3.08208	1.11876	0.0260767
AFFX-Dm-Q9MA54_at		2.89585	3.23954	1.11868	0.00927195
1628668_at		4.39173	4.91289	1.11867	0.0419807
1638369_at		3.81106	4.26282	1.11854	0.00816582
1638008_s_at	CG2003	9.94975	11.1286	1.11848	0.00460817
1638520_at	nudE	9.58543	10.7207	1.11843	0.267721
1638624_at	P5cr	9.10344	10.1811	1.11838	0.0185361
1627791_at		3.36566	3.76389	1.11832	0.0808091
1628807_at	CG5205	8.24509	9.22049	1.1183	0.0363528
1623030_at	CG11726	3.60384	4.03015	1.11829	0.320799
1625277_at	CG32463	3.02136	3.37866	1.11826	0.0325515
1632408_at	Dhc64C	3.60644	4.03284	1.11823	0.0864301
1634476_at		3.54171	3.96031	1.11819	0.0394024
1633433_at	CG12866	2.57563	2.88004	1.11819	0.21586
1630309_s_at		9.75048	10.9027	1.11817	0.265515
1629414_at		5.40932	6.04826	1.11812	0.00364282
1630228_at		2.92059	3.26552	1.1181	0.00507633
1638357_at		4.09832	4.58229	1.11809	0.0801255
1639800_at		4.01073	4.48426	1.11806	0.0675647
1626921_at		3.75432	4.19737	1.11801	0.0149492
1633669_at	CG31798	3.38022	3.77901	1.11798	0.0153083
1638065_at		3.21853	3.5982	1.11796	0.150363
1640156_at	CG3544	3.04799	3.40753	1.11796	0.11943
1625840_at	CG12001	6.5646	7.33891	1.11795	0.315828
1630277_at	CG30048	3.62311	4.05038	1.11793	0.0220124
1632376_at	CG5644	5.47465	6.11983	1.11785	0.158522
1635076_at	CG12674	2.73472	3.05676	1.11776	0.0241661
1623681_at	CG10163	4.18776	4.68076	1.11772	0.449223
1631705_at	CG7442	3.74261	4.18285	1.11763	0.0578704
1623840_at	CG18607	4.66001	5.20814	1.11762	0.197326
1633470_at	RN-tre	7.95582	8.89158	1.11762	0.000131992
1634007_at		4.16897	4.659	1.11754	0.0710188
1628901_at	Asx	10.0144	11.1915	1.11754	0.119553
1623603_at	CG4793	4.60471	5.14593	1.11754	0.442602
1637363_at	CG5890	3.46125	3.86799	1.11752	0.0994781
1637450_at		2.62194	2.92994	1.11747	0.0230498
1625200_at	CG42672	3.59638	4.01869	1.11743	0.0583662
1623425_at	Buffy	8.6049	9.61524	1.11741	0.065783
1629022_at	CG13991	3.26727	3.65068	1.11735	0.0347562
1625230_a_at	CG42389	10.3594	11.5751	1.11735	3.62e-05
1630481_at	CG33631	3.18531	3.55909	1.11735	0.0983121
1625588_s_at	CG6199	12.0173	13.427	1.11731	4.17e-06
1634882_at	Acp63F	3.91225	4.37119	1.11731	0.217548
1634681_a_at	Ucp4B	5.93625	6.63253	1.11729	0.0778139
1625715_at		4.88795	5.46108	1.11725	0.0105267
1634224_at	CG9997	2.97821	3.32737	1.11724	0.0370882
1637948_at		3.36116	3.75516	1.11722	0.00360763
1627938_at	CG17840	8.02502	8.96506	1.11714	0.00757753
1638693_s_at	CG1882	9.91559	11.077	1.11713	0.00336204
1635612_at		3.59512	4.01598	1.11707	0.0454749
1641277_at		5.15202	5.75509	1.11706	0.0109748
1627818_s_at	Gad1	8.41688	9.40207	1.11705	0.0497858
1624640_x_at		2.78452	3.11034	1.11701	0.00939329
1638778_at	CG10352	5.01112	5.59728	1.11697	0.0114772
1634965_at		3.54131	3.95544	1.11694	0.00269183
1624794_at	CG10845	3.1607	3.53011	1.11687	0.00111531
1636592_at		2.99476	3.34449	1.11678	0.0673945
1625569_at	CG7565	8.66576	9.67769	1.11677	0.000244852
1630693_at		4.0993	4.5779	1.11675	0.0160153
1628760_at	CG8517	3.44825	3.85065	1.1167	0.0573553
1637652_a_at	CG30222	2.7306	3.04904	1.11662	0.0206085
1632351_at	Femcoat	4.49119	5.01486	1.1166	0.18474
1628816_at		3.29134	3.67511	1.1166	0.029247
1633603_at		4.09998	4.57796	1.11658	0.00904082
1638191_at	cv-c	4.40655	4.9202	1.11656	0.0269161
1631398_at	Toll-4	3.49304	3.90011	1.11654	0.0483873
1624920_at		3.94778	4.40783	1.11653	0.0152216
1640709_s_at		5.48206	6.12091	1.11653	0.00461859
1631839_at		3.33281	3.72115	1.11652	0.00159605
1635775_at	CG15207	4.02531	4.49408	1.11646	0.0203642
1636590_s_at	klhl10	3.48692	3.89299	1.11645	0.053802
1641583_at	CG14443	3.41052	3.80723	1.11632	0.234962
1634680_at		6.14618	6.86102	1.11631	0.00817743
1624036_at	Cht5	10.4243	11.6361	1.11624	0.0346675
1625186_at	CG9589	4.59913	5.13373	1.11624	0.0221372
1640621_at	ACXB	2.96167	3.3059	1.11623	0.0272148
1633342_at		4.61666	5.15313	1.1162	0.0476322
1629397_at		5.49985	6.13883	1.11618	0.337475
1635880_at	CG15710	3.93336	4.3903	1.11617	0.0358757
1637706_at	CG7330	8.69687	9.70717	1.11617	0.242926
1632232_at		5.47835	6.1147	1.11616	0.182243
1624686_a_at	dnc	7.65818	8.54767	1.11615	0.0270032
1641292_at	CG32834	4.35467	4.86041	1.11614	0.0294665
1641715_at	CG11162	4.11957	4.59787	1.1161	0.0469996
1627210_at	MstProx	3.62378	4.04387	1.11593	0.0555165
1631667_at		3.4266	3.82371	1.11589	0.0952922
1640492_at	CG10672	9.30756	10.3854	1.1158	0.0430766
1634275_s_at		4.18045	4.6644	1.11577	0.0291314
1626033_at	Atg9	9.52724	10.6293	1.11568	0.00306672
1631545_at		3.58355	3.99756	1.11553	0.0169922
1638891_at	CG31031	3.58838	4.00271	1.11546	0.168708
1641177_at	CG1428	3.14552	3.50871	1.11546	0.0457777
1633015_at		4.6956	5.23768	1.11544	0.00395441
1632970_at	CG15336	4.7388	5.28576	1.11542	0.00383631
1634821_at	Ir52c	2.56143	2.85705	1.11541	0.226791
1627996_a_at	Pi4KIIalpha	9.52073	10.6187	1.11532	0.000602822
1630909_at		5.07418	5.65933	1.11532	0.0250553
1626395_at		3.30103	3.6815	1.11526	0.0579009
1637431_at	CG42732	3.12663	3.48668	1.11515	0.00115051
1640550_at		4.99679	5.5721	1.11514	0.037156
1623949_s_at	CG32816	7.80771	8.70659	1.11513	0.147838
1636434_at		4.23123	4.71829	1.11511	0.0302621
1641197_at	CG12377	3.48741	3.88878	1.11509	0.00771506
1634082_at	eIF4E-4	4.85182	5.41021	1.11509	0.06978
1638910_at	CG5561	5.08668	5.67209	1.11509	0.00181784
1626462_at	CG7691	2.91763	3.25332	1.11506	0.0389813
1638470_at		3.28198	3.65948	1.11502	0.030196
1638585_at	CG4721	8.77012	9.77883	1.11502	0.167621
1641663_at	CG34394	5.63452	6.2824	1.11498	0.004876
1634481_at	RhoGAP18B	9.30097	10.3701	1.11495	4.04e-05
1639213_s_at	CG42343	4.59965	5.12832	1.11494	0.00136456
AFFX-r2-Bs-dap-M_at		2.6259	2.92752	1.11486	0.0302993
1640782_at	Nup54	10.5968	11.8139	1.11485	0.00115769
1623494_at	ImpE3	7.77042	8.66229	1.11478	0.0133487
1634246_at	CG11319	6.06318	6.75861	1.1147	0.235965
1639166_at		7.96413	8.87726	1.11466	0.0623883
1630150_s_at	Cg25C	12.5361	13.973	1.11462	7.49e-05
1640922_a_at	Hnf4	9.60887	10.7089	1.11448	0.000478171
1632980_at	CG3902	10.959	12.2126	1.11439	3.05e-05
1640235_at	W	9.60228	10.7005	1.11437	0.0554224
1623362_at		4.05341	4.51694	1.11435	0.0167074
1637685_at		3.65747	4.07568	1.11434	0.0273346
1640093_at		3.55466	3.96097	1.1143	0.0282004
1624352_at	dpr13	5.9178	6.59414	1.11429	0.00789445
1637095_at	CG15818	7.17618	7.99629	1.11428	0.0174319
1637830_s_at	CG31145	9.29199	10.3539	1.11428	0.0401528
1635304_at	CG13954	4.50092	5.01529	1.11428	0.071538
1636422_at		3.99533	4.45175	1.11424	0.0445776
1625404_at		4.49824	5.01204	1.11422	0.16438
1630452_at		10.8892	12.1329	1.11421	0.0935857
AFFX-Dm-O82296_at		2.47668	2.75952	1.1142	0.00342399
1628190_at	CG33981	7.76753	8.65434	1.11417	0.305953
1640503_at		4.11452	4.58426	1.11416	0.0119095
1632268_at		3.963	4.41538	1.11415	0.0431879
1625598_at	CG31326	4.08759	4.55418	1.11415	0.0179123
1626958_at		3.45176	3.8457	1.11413	0.00630796
1624199_at	sNPF-R	5.78151	6.44127	1.11412	0.10525
1638412_at	px	9.48746	10.57	1.1141	0.00065562
1632130_s_at	SRPK	9.76386	10.8778	1.11409	0.217144
1627730_at		4.65925	5.19063	1.11405	0.00217294
1626063_at		3.34204	3.72314	1.11403	0.0520479
1627694_at	CG9715	9.82026	10.94	1.11403	0.19295
1638630_at	CG1983	9.82092	10.9404	1.11399	0.00023348
1635842_at	mop	9.757	10.8689	1.11396	0.0824126
1633907_at		3.27895	3.6526	1.11395	0.0467519
1632292_at	Myt1	7.77771	8.66355	1.11389	0.00654557
1631269_at		4.72341	5.26118	1.11385	0.0103634
1626865_at		3.16505	3.52526	1.11381	0.0110403
1628886_at		3.81427	4.24831	1.11379	0.0588316
1630113_at	CG10660	8.3255	9.27261	1.11376	0.054471
1628972_at	CG30488	6.31595	7.03433	1.11374	0.00833848
1640348_at	CG5050	5.30844	5.91217	1.11373	0.0595138
1640507_s_at	CR40465	3.27819	3.65101	1.11373	0.0688523
1641509_at	CG12964	8.1929	9.12459	1.11372	0.0889727
1641067_at		3.46959	3.86413	1.11371	0.0456204
1637899_at	wash	6.93981	7.72893	1.11371	0.0192657
1631990_at	Or33b	2.60248	2.89838	1.1137	0.00325206
1639315_at		4.38867	4.88759	1.11368	0.0193016
1630910_at		2.88252	3.21005	1.11363	0.0122427
1626596_at	CG32437	3.19588	3.55901	1.11363	0.134869
1637609_at		4.67289	5.20371	1.1136	0.00102729
1627581_at	CG8080	10.4709	11.6601	1.11358	0.000161447
1637416_at		4.41406	4.9153	1.11356	0.0282061
1629233_s_at	Cerk	10.2336	11.3957	1.11355	0.000363961
1631380_s_at	LanB1	12.0589	13.4276	1.1135	0.00323865
1629184_at	CG3819	5.79369	6.45109	1.11347	0.657481
1626450_at		3.47505	3.86932	1.11346	0.0169366
1636438_s_at		4.66914	5.19885	1.11345	0.0133239
1632104_at		4.09299	4.55733	1.11345	0.00764678
1626346_at		4.00044	4.45413	1.11341	0.0392448
1633323_at	CG3916	4.65823	5.18641	1.11339	0.0196654
1633641_a_at	CG15611	6.88452	7.66504	1.11337	0.191694
1638619_s_at	CG17698	5.99841	6.67839	1.11336	0.0155883
1639577_at		3.38136	3.76466	1.11336	0.0155181
AFFX-Dm-Q9LVE8_at		2.29204	2.55184	1.11335	0.20701
1624783_at	CG14961	5.50599	6.13006	1.11335	0.0148132
1638756_at	CG17279	3.96638	4.41591	1.11333	0.101563
1637894_at	CG14509	8.15541	9.0797	1.11333	0.068364
1626037_at	CG14380	2.64248	2.94192	1.11332	0.101473
1624751_at	CG10478	2.82861	3.14901	1.11327	0.0203244
1628923_at	form3	4.86345	5.41413	1.11323	0.033143
1636125_a_at	granny-smith	9.67157	10.7665	1.11321	0.00747791
1632958_a_at		7.13376	7.94133	1.1132	0.171506
1636463_at	Ucp4B	4.72102	5.25544	1.1132	0.290812
1629395_at	CG9743	10.4277	11.608	1.11319	0.00478355
1640772_at		3.12059	3.47379	1.11318	0.018448
1639634_at	CG12860	3.962	4.41005	1.11309	0.0420206
1632257_at	CG31183	5.40063	6.01128	1.11307	0.0513486
1637016_at	gpp	8.60505	9.57775	1.11304	0.0859487
1636869_at		9.82029	10.9301	1.11301	0.217305
1629755_at		5.18928	5.77574	1.11301	0.00244531
1633808_at		3.5044	3.90032	1.11298	0.0200298
1633376_at		4.22321	4.70033	1.11298	0.0201983
1629717_at		4.58253	5.10007	1.11294	0.0049254
AFFX-r2-Bs-thr-5_s_at		2.73442	3.04318	1.11292	0.0739613
1627835_a_at	Cda5	9.1342	10.1656	1.11292	0.150831
1634005_at	CG7906	2.96042	3.29468	1.11291	0.183306
1630979_at	CG13144	5.23209	5.82285	1.11291	0.0322802
1632324_at	TTLL3B	4.11291	4.57727	1.1129	0.00850393
1631685_at		4.26296	4.74369	1.11277	0.106828
1626390_at	Ced-12	10.5531	11.7429	1.11274	0.0321056
1640694_at		2.79297	3.1077	1.11269	0.035772
1635432_at	CG14607	3.20235	3.56312	1.11266	0.0691082
1630058_at		3.28049	3.64975	1.11256	0.0546726
1623433_at	CG30369	3.05191	3.39535	1.11253	0.178388
1631315_at	CG12730	11.2324	12.4959	1.11249	2e-05
1639922_at		2.81862	3.13557	1.11245	0.027705
1636467_at		5.12348	5.69939	1.11241	0.0218323
1629923_at	CG7371	9.21057	10.2459	1.1124	0.000320879
1630616_at	Ugt37a1	3.70325	4.1195	1.1124	0.148291
1633620_at		3.09872	3.44696	1.11238	0.124711
1641132_at		7.493	8.33476	1.11234	0.139044
1629890_a_at	CG6262	3.37701	3.75634	1.11233	0.00615181
1637938_at	CG18636	3.19	3.5483	1.11232	0.119442
1641668_at		4.36526	4.8553	1.11226	0.00425109
1640935_x_at		4.28219	4.7629	1.11226	0.00301504
1628158_at		3.2997	3.67	1.11222	0.0923509
AFFX-Dm-O65372_at		3.35177	3.72783	1.1122	0.0499571
1623987_at	CG12679	3.44301	3.8293	1.1122	0.0363692
1637044_at		4.07757	4.53505	1.1122	0.0445665
1625062_a_at	CG32806	3.53397	3.93043	1.11219	0.0159741
1623007_a_at	pico	5.9721	6.64208	1.11219	0.0265328
1637449_at	Snoo	3.70028	4.11506	1.11209	0.0202203
1626852_at		2.27075	2.52528	1.11209	0.0229855
1633507_at		4.52613	5.03343	1.11208	0.0418756
1630096_at	CG2533	6.10841	6.79302	1.11208	0.055126
1625219_at	ninaC	2.79843	3.11191	1.11202	0.214182
1630871_at		4.03422	4.48588	1.11196	0.0339
1628711_at	CG12307	4.44095	4.93814	1.11196	0.0651767
1634913_s_at	pes	8.86715	9.85988	1.11196	0.000431608
1634269_at	CG13784	10.2968	11.4496	1.11195	0.0676199
1634790_at		3.40621	3.78754	1.11195	0.0677141
1641545_at	cv-c	4.41222	4.90613	1.11194	0.0106998
1639753_at	CG34357	4.43305	4.92929	1.11194	0.00494914
1641576_a_at	CG5205	7.63162	8.48588	1.11194	0.0300256
1623446_a_at	CG14246	4.01351	4.46273	1.11193	0.0196007
1638276_at	Obp56e	3.99749	4.44474	1.11188	0.0245807
1640001_at	Rme-8	9.60304	10.6774	1.11188	0.0672205
1637594_at	CG42388	4.69035	5.21507	1.11187	0.11959
1640743_at	Dip-C	9.88238	10.9879	1.11187	0.00197792
1630472_at		3.17623	3.53153	1.11186	0.00491106
1639391_at	CG17109	9.78916	10.8839	1.11184	0.239754
1629230_at	dro2	4.11689	4.57715	1.1118	0.217222
1626703_at		4.72055	5.24815	1.11177	0.0383969
1637727_at	CG7049	9.66199	10.7414	1.11172	0.000353326
1636515_at	CG14354	3.55589	3.95293	1.11166	0.0812077
1635406_at	Pkg21D	5.69497	6.33053	1.1116	0.104298
1641723_a_at	PGRP-LC	7.63999	8.49256	1.11159	0.174383
1639065_at		5.03526	5.59713	1.11159	0.00102044
1635412_at	CG7422	5.9814	6.64807	1.11146	0.201048
1624523_at	CG32683	3.51318	3.90466	1.11143	0.207883
1638638_at	Ir67a	2.8987	3.22158	1.11139	0.140843
1641410_at		4.53971	5.04525	1.11136	0.0022145
1626402_at	CG31427	3.58214	3.98103	1.11135	0.008029
1636936_at	CG42449	3.88457	4.31685	1.11128	0.0325434
1634190_a_at	CG6138	5.07013	5.6343	1.11127	0.0312032
1641601_at	CG31682	2.76009	3.06715	1.11125	0.100527
1623415_at	dl	6.25948	6.95581	1.11124	0.198451
1637023_at	CG14370	2.84819	3.16502	1.11124	0.039505
1633151_at		3.54735	3.94185	1.11121	0.0720558
1623180_a_at	Hr46	9.89064	10.9896	1.11112	0.274585
1635912_at	Rh7	4.63015	5.14459	1.11111	0.00647497
1638449_at	Camta	3.10203	3.44667	1.1111	0.0432439
1629070_at	CG1208	6.66728	7.40779	1.11107	0.201799
1632192_at	CG14564	4.50911	5.00987	1.11106	0.0231238
1634569_at	CG34051	4.29465	4.77149	1.11103	0.039345
1623089_at	MstProx	4.16139	4.62288	1.1109	0.00641608
1634814_at	CG7083	9.31263	10.3453	1.11089	0.00361243
1636133_at		2.78569	3.09442	1.11083	0.140434
1636324_at	CG42686	4.72398	5.2475	1.11082	0.00509432
1639062_at	CG31464	5.36851	5.96328	1.11079	0.311947
1626195_at	CG12620	4.09209	4.54523	1.11074	0.0164728
1623562_at	CG14431	4.69607	5.21604	1.11072	0.0156464
1623205_at		3.78198	4.20068	1.11071	0.0234648
1640926_at		3.55874	3.95271	1.11071	0.012864
1623028_at	CG14872	7.61127	8.45363	1.11067	0.144018
1633204_a_at	Hip1	8.88545	9.86861	1.11065	0.104119
1625998_s_at		3.85349	4.27977	1.11062	0.0803712
1636747_at	snmRNA:763	6.65721	7.39349	1.1106	0.0746548
1628545_at	Ir48b	3.54232	3.93408	1.11059	0.0141783
1633534_s_at	mura	9.36729	10.4032	1.11059	0.106059
1627821_s_at	Syt7	9.90537	11.0008	1.11059	0.00176767
1625660_at	CG4151	3.52248	3.91201	1.11058	0.00720804
1628570_at	CG4021	3.05945	3.39775	1.11058	0.00462125
1639582_at	Pde11	8.32938	9.25013	1.11054	0.0321187
1634322_at		3.47154	3.85525	1.11053	0.0171447
1629162_at	Gr63a	4.62822	5.13949	1.11047	0.109121
1636209_at		7.33027	8.13993	1.11045	0.000582248
1634096_at	Aldh	10.0099	11.1155	1.11045	0.088185
1640370_at		3.47213	3.85556	1.11043	0.000356459
1636859_at		4.49983	4.99664	1.11041	0.0773693
1640769_at		4.0749	4.5247	1.11038	0.00745004
1631347_at	CG30393	2.5191	2.79713	1.11037	0.0200626
1639703_s_at	CG10936	9.05755	10.0572	1.11037	0.0417305
1631884_at		3.64346	4.04556	1.11036	0.105565
1636977_at	CG9318	11.0516	12.2711	1.11035	0.00740557
1638932_at		2.48219	2.75601	1.11032	0.181376
1639156_at		4.13872	4.59502	1.11025	0.0303792
1635238_s_at	Mbs	10.241	11.3698	1.11022	0.096831
1623070_a_at	Shaw	5.08639	5.64681	1.11018	0.000274415
1627376_at	Rel	9.01108	10.0037	1.11016	0.0265096
1637641_at	Mkp3	8.4572	9.38864	1.11014	0.135502
1626982_at		3.51531	3.90225	1.11007	0.0616943
1632593_at	CG32147	10.7573	11.9411	1.11005	4.77e-05
1630363_at	CG10469	7.12014	7.90366	1.11004	0.138784
1638643_at		3.12259	3.46618	1.11003	0.00154373
1634716_s_at	Dh31-R1	6.84301	7.59597	1.11003	0.0384963
1624744_a_at	nuf	11.6232	12.902	1.11003	0.00232165
1625894_at	CG11370	7.45088	8.27035	1.10998	0.417201
1623074_at		4.45495	4.94491	1.10998	0.0375259
1638401_at	CG13589	3.44811	3.82721	1.10994	0.0075625
1633508_at	CR31700	3.17967	3.52918	1.10992	0.00213772
1641206_at	sima	9.8644	10.9486	1.10991	0.0750176
1625402_at	Ugt36Bb	3.47381	3.85561	1.10991	0.105705
1641686_at	ppk23	4.11543	4.56763	1.10988	0.0853786
1631950_at		3.14287	3.48805	1.10983	0.0733421
1634590_at	trh	5.18679	5.7564	1.10982	0.000463219
1633391_at	Irc	11.5585	12.8274	1.10978	2.28e-05
1641179_at	CG4631	4.29875	4.77065	1.10978	0.235414
1626548_s_at		3.15858	3.50529	1.10977	0.114242
1624358_at	CG12531	3.79512	4.21146	1.1097	0.0612905
1635169_at		3.61144	4.00752	1.10967	0.0398794
1627240_at	CG13039	2.46417	2.73441	1.10967	0.0548982
1630828_at		4.34575	4.82233	1.10966	0.0104291
1628705_at	PH4alphaEFB	11.777	13.0685	1.10966	1.17e-05
1627332_at		3.88718	4.3131	1.10957	0.0324377
1640233_at	CG5174	11.5042	12.7644	1.10954	1.3e-05
1639380_a_at	Hsc70-1	9.06072	10.0527	1.10949	0.192221
1639132_at		4.00286	4.44107	1.10947	0.0495208
1628329_at	Gr22b	2.68378	2.97756	1.10946	0.185549
1627165_a_at	Nmnat	7.13349	7.91426	1.10945	0.0844534
1635397_at	mthl12	2.62341	2.91043	1.1094	0.174867
1628547_at	CG5167	8.68161	9.63138	1.1094	0.0303392
1633828_at		3.09149	3.42968	1.10939	0.0220427
1632569_at		3.24129	3.59582	1.10938	0.0142339
1623413_at		4.24683	4.71123	1.10935	0.0524359
1636744_at		3.14125	3.48437	1.10923	0.0220547
1638082_at	CG6678	6.13461	6.80463	1.10922	0.0274859
1627191_a_at	ena	11.2639	12.4935	1.10917	0.0274028
1633666_at	CG33145	3.82633	4.24387	1.10912	0.00412703
1630858_s_at	CG7816	9.50487	10.5416	1.10908	0.000402719
1636525_at	CG13541	3.87717	4.30007	1.10907	0.151695
1631387_at	CG30344	10.5411	11.6904	1.10903	0.000252869
1627863_at	CG9947	9.6649	10.7184	1.109	0.00141139
1631619_a_at	MTF-1	9.11371	10.1056	1.10883	0.00412035
1623538_at		3.8782	4.30016	1.10881	0.039269
1629298_at	Gr94a	3.75952	4.16848	1.10878	0.0338944
1635138_at	Fur1	9.39071	10.412	1.10876	0.000427349
1637790_a_at	ymp	3.13865	3.47996	1.10874	0.100209
1631057_at		3.33708	3.69991	1.10873	0.0832235
1630904_x_at		2.51742	2.79112	1.10872	0.183638
1627094_at		2.87271	3.18499	1.10871	0.0225569
1629004_at	CG34249	5.16907	5.73083	1.10868	0.0156396
1630609_s_at	CG2225	5.27469	5.84775	1.10864	0.35102
1623938_at		4.00407	4.43906	1.10864	0.0469273
1628917_at	CG33308	3.12317	3.46244	1.10863	0.00646145
1623508_at	CG30466	7.11881	7.89207	1.10862	0.247675
1628523_at		3.23586	3.58731	1.10861	0.0812914
1623416_at	Muc68E	4.22978	4.6891	1.10859	0.311797
1640255_at		2.5601	2.8381	1.10859	0.10677
1627975_at	TotB	2.5227	2.79664	1.10859	0.200784
1634368_at		4.75684	5.2732	1.10855	0.010136
1637141_at	CG4705	7.17924	7.95816	1.1085	0.0148945
1627060_s_at	Gel	11.9304	13.2246	1.10848	0.000162726
[truncated: 16,956 more rows]
