# Supplementary material for: Tramtrack Is Genetically Upstream of Genes Controlling Tracheal Tube Size in Drosophila
Source: PLoS One. 2011 Dec 22;6(12):e28985. doi: 10.1371/journal.pone.0028985 (PMC3245245; doi:10.1371/journal.pone.0028985)
Supplement: Table S6 — Selected Gene Ontology terms with putative involvement in tracheal development, and genes with that annotation which are mis-regulated either in our microarray dataset or in S2 cells. (XLS) [file pone.0028985.s010.xls]

## Sheet: Sheet1
Supplementary Table 6: Selected Gene Ontology terms with putative involvement in tracheal development
Selected Gene Ontology terms with putative involvement in tracheal development, and genes with that annotation which are mis-regulated either in our microarray dataset or in S2 cells (Reddy et al. 2010). Line 5 reads: 20 genes annotated with GO:0005834, 2 of which showing gene expression changes, namely CG17760 and Galpha73B. Note that these GO terms are not statistically over-represented and the…
	children of plasma membrane GO term with Ttk69 targets
20/2	GO:0005834 - heterotrimeric G-protein complex	CG17760	Galpha73B
376/59	GO:0005886 - plasma membrane	hiw	Oamb	5-HT7	Ret	wek	hts	Ank2	Appl	ft	rost	lea	Snap25	Takr86C	arr	gogo	Lcch3	mol	Mdr65	mod(mdg4)	CG4476	dlg1	Fatp	Sema-5c	Ror	Cad96Cb	Toll-7	rk	mAcR-60C	kek1	Alk	CG1732	Glu-RI	stet	Ih	tipE	tor	Ndae1	CG1909	trpl	l(2)01289	kek2	ImpE3	Nrx-1	kar	fz2	Gyc32E	Fur2	Cad89D
140/39	GO:0005887 - integral to plasma membrane	Oamb	nAcRbeta-96A	PGRP-SA	5-HT7	CG1732	Sr-CIV	ninaD	PGRP-LA	Mdr49	tipE	bib	CG15279	CG13796	trpl	ft	PGRP-SC2	Cad74A	blot	Takr86C	PGRP-SD	BicC	5-HT1A	PGRP-LE	Cad89D	santa-maria	yin	Mdr65	ine	CG4476	drl	GRHRII	Ror	Cad96Cb	CG7227	mAcR-60C	CcapR	5-HT1B	oa2	Alk
8/1	GO:0005890 - sodium:potassium-exchanging ATPase complex	CG5250
6/1	GO:0005891 - voltage-gated calcium channel complex	Ca-alpha1D
15/4	GO:0005892 - nicotinic acetylcholine-gated receptor-channel complex	nAcRbeta-21C	nAcRalpha-30D	nAcRbeta-96A	nAcRalpha-34E
5/1	GO:0005911 - cell-cell junction	Abl
30/2	GO:0005912 - adherens junction	Abl	cno
9/1	GO:0005915 - zonula adherens	cno
25/3	GO:0005918 - septate junction	vari	dlg1	scrib
8/2	GO:0005921 - gap junction	inx2	zpg
15/2	GO:0005925 - focal adhesion	by	CAP
1/1	GO:0005926 - connecting hemi-adherens junction	cno
6/1	GO:0005927 - muscle tendon junction	Abl
48/7	GO:0005938 - cell cortex	spir	sha	pon	cno	Dok	dlg1	mira
20/2	GO:0008076 - voltage-gated potassium channel complex	CG3397	KCNQ
8/2	GO:0008305 - integrin complex	alphaPS5	betaInt-nu
4/2	GO:0009897 - external side of plasma membrane	fs(1)M3	fs(1)N
10/1	GO:0016027 - inaD signaling complex	trpl
12/3	GO:0016323 - basolateral plasma membrane	dlg1	Ca-alpha1D	scrib
28/3	GO:0016324 - apical plasma membrane	T48	Cad74A	Ca-alpha1D
12/2	GO:0016327 - apicolateral plasma membrane	dlg1	scrib
8/3	GO:0016328 - lateral plasma membrane	vari	sprt	scrib
6/3	GO:0019897 - extrinsic to plasma membrane	Abl	wrapper	dally
2/1	GO:0030054 - cell junction	CG1909
8/2	GO:0030288 - outer membrane-bounded periplasmic space	Nmdar1	Nmdar2
1/1	GO:0031226 - intrinsic to plasma membrane	Rab26
13/1	GO:0035003 - subapical complex	scrib
16/2	GO:0042600 - chorion	CG11381	CG13083
29/3	GO:0045179 - apical cortex	Abl	dlg1	mira
7/2	GO:0045180 - basal cortex	mira	pon
3/2	GO:0046658 - anchored to plasma membrane	Aph-4	Treh
5/1	GO:0060388 - vitelline envelope	fs(1)N
	children of open tracheal system GO term with Ttk69 targets
107/11	GO:0007424 - open tracheal system development	caps	DAAM	hdc	esg	csw	vari	Cad96Cb	pnt	W	Mmp1	dp
27/3	GO:0007426 - tracheal outgrowth, open tracheal system	pnt	ttk	lea
27/2	GO:0007427 - epithelial cell migration, open tracheal system	csw	sfl
19/3	GO:0007428 - primary branching, open tracheal system	csw	sfl	pnt
4/1	GO:0007429 - secondary branching, open tracheal system	pnt
11/1	GO:0007430 - terminal branching, open tracheal system	hdc
6/3	GO:0035001 - dorsal trunk growth, open tracheal system	vari	Mmp1	ttk
19/4	GO:0035147 - branch fusion, open tracheal system	caps	ttk	hdc	esg
16/2	GO:0035151 - regulation of tube size, open tracheal system	vari	ttk
11/1	GO:0035152 - regulation of tube architecture, open tracheal system	DAAM
4/1	GO:0035155 - negative regulation of terminal cell fate specification	hdc
3/1	GO:0035156 - fusion cell fate specification	esg
24/3	GO:0035159 - regulation of tube length, open tracheal system	vari	ft	Mmp1
18/1	GO:0035277 - spiracle morphogenesis, open tracheal system	Gef64C
1/1	GO:0060446 - branching involved in open tracheal system development	ttk
	children of regulation of cell shape GO term with Ttk69 targets
11/2	GO:0007394 - dorsal closure, elongation of leading edge cells	cno	Dok
89/4	GO:0008360 - regulation of cell shape	CG42674	CG7028	Abl	ttk
18/1	GO:0016476 - regulation of embryonic cell shape	ttk
	children of cell migration GO term with Ttk69 targets
2/1	GO:0001764 - neuron migration	lea
20/4	GO:0007280 - pole cell migration	nos	tor	disp	scrib
18/1	GO:0007297 - ovarian follicle cell migration	BicC
73/4	GO:0007298 - border follicle cell migration	Rala	hep	spri	grk
4/1	GO:0007395 - dorsal closure, spreading of leading edge cells	hep
27/2	GO:0007427 - epithelial cell migration, open tracheal system	csw	sfl
24/1	GO:0008347 - glial cell migration	pyr
38/5	GO:0008354 - germ cell migration	nos	dl	mod(mdg4)	Mdr49	faf
23/2	GO:0016477 - cell migration	caps	CG10083
14/2	GO:0035099 - hemocyte migration	Pvf2	sn
	children of cytoskeleton GO term with Ttk69 targets
36/2	GO:0005813 - centrosome	sced	Nek2
11/1	GO:0005814 - centriole	Sas-4
7/1	GO:0005815 - microtubule organizing center	gammaTub37C
3/2	GO:0005818 - aster	Klp3A	mira
35/2	GO:0005819 - spindle	Klp3A	mars
9/1	GO:0005828 - kinetochore microtubule	mars
46/6	GO:0005856 - cytoskeleton	CG34417	CG1909	Sop2	dnr1	CG10083	dlg1
11/2	GO:0005858 - axonemal dynein complex	Dhc98D	Dhc36C
2/1	GO:0005862 - muscle thin filament tropomyosin	Tm1
13/1	GO:0005868 - cytoplasmic dynein complex	CG10859
30/5	GO:0005871 - kinesin complex	cos	nod	Klp3A	sub	Kif19A
3/1	GO:0005873 - plus-end kinesin complex	sub
27/6	GO:0005874 - microtubule	gammaTub37C	betaTub97EF	alphaTub67C	CG1890	CG3085	alphaTub85E
317/29	GO:0005875 - microtubule associated complex	CG10077	CG10859	Hsp26	Map205	wee	CG5028	CG12512	Dhc36C	Yp1	Pen	Hsp27	gammaTub37C	Hsp23	tral	CG34417	Yp2	Hsc70-1	CG11905	Hsp70Bbb	aub	Dhc98D	Pros28.1	CG18190	Top1	Rbp2	Klp3A	RpS5b	cos	sub
9/2	GO:0005876 - spindle microtubule	sub	Map205
4/1	GO:0005881 - cytoplasmic microtubule	Map205
21/1	GO:0005884 - actin filament	Act88F
6/1	GO:0005885 - Arp2/3 protein complex	Sop2
4/1	GO:0008275 - gamma-tubulin small complex	gammaTub37C
17/2	GO:0015629 - actin cytoskeleton	Pen	sn
23/1	GO:0016459 - myosin complex	Myo28B1
30/2	GO:0030286 - dynein complex	CG10859	robl37BC
7/1	GO:0031941 - filamentous actin	sn
9/3	GO:0045298 - tubulin complex	gammaTub37C	alphaTub85E	alphaTub67C
11/2	GO:0051233 - spindle midzone	Klp3A	sub
	children of vesicle-mediated GO term with Ttk69 targets
13/1	GO:0006887 - exocytosis	disp
19/1	GO:0006888 - ER to Golgi vesicle-mediated transport	tral
4/1	GO:0006892 - post-Golgi vesicle-mediated transport	Gga
2/1	GO:0006893 - Golgi to plasma membrane transport	Snap25
31/2	GO:0006897 - endocytosis	rb	faf
7/1	GO:0006898 - receptor-mediated endocytosis	LpR1
11/1	GO:0006901 - vesicle coating	rb
8/1	GO:0006904 - vesicle docking involved in exocytosis	Slh
11/1	GO:0006909 - phagocytosis	nimC1
1/1	GO:0006910 - phagocytosis, recognition	eater
190/19	GO:0006911 - phagocytosis, engulfment	Pi3K68D	CG31345	CG2993	alien	Slh	CG9527	Parg	CG6191	CG4615	Tig	Eip93F	TepII	Act88F	CG13284	Unc-76	Bx	pnt	l(2)37Cd	cact
24/4	GO:0016079 - synaptic vesicle exocytosis	cpx	Syt7	Rph	synaptogyrin
93/6	GO:0016192 - vesicle-mediated transport	rb	Syt7	spir	Slh	Rph	Snap25
2/1	GO:0017157 - regulation of exocytosis	Rab26
1/1	GO:0017158 - regulation of calcium ion-dependent exocytosis	synaptogyrin
7/1	GO:0030100 - regulation of endocytosis	scrib
1/1	GO:0031631 - negative regulation of synaptic vesicle fusion	GABA-B-R2
1/1	GO:0045055 - regulated secretory pathway	PICK1
1/1	GO:0045479 - vesicle-fusome targeting	bam
28/1	GO:0048488 - synaptic vesicle endocytosis	Rph
14/1	GO:0048489 - synaptic vesicle transport	Snap25
[truncated: 11 more columns]
